# Supplementary material for: CRISPR-free base editors with enhanced activity and expanded targeting scope in mitochondrial and nuclear DNA
Source: PubMed Central journal article supplement (PMC9463067; doi:10.1038/s41587-022-01256-8), 2022-04-04
Supplement: 41587_2022_1256_MOESM1_ESM.pdf [file 41587_2022_1256_MOESM1_ESM.pdf]

---

**Supplementary information**

---

**CRISPR-free base editors with enhanced activity and expanded targeting scope in mitochondrial and nuclear DNA**

---

In the format provided by the authors and unedited

## Supplementary Information

### **Continuous evolution of mitochondria base editors with improved activity and expanded targeting scope**

Beverly Y. Mok<sup>1,2,3</sup>, Anna V. Kotrys<sup>4,5</sup>, Aditya Raguram<sup>1,2,3</sup>, Tony P. Huang<sup>1,2,3</sup>, Vamsi K. Mootha<sup>4,5</sup> and David R. Liu<sup>1,2,3\*</sup>

|                                                                                                                                                                           | Page # |
|---------------------------------------------------------------------------------------------------------------------------------------------------------------------------|--------|
| <b>Supplementary Discussion</b>                                                                                                                                           | 3-4    |
| <b>Supplementary Table 1.</b> Mutation table of variants from PANCE of canonical T7-DdCBE for improved <u>TC</u> activity using PANCE                                     | 5      |
| <b>Supplementary Table 2.</b> Mutation table of variants from PACE of T7-DdCBE-DddA1 for improved <u>TC</u> activity                                                      | 6      |
| <b>Supplementary Table 3.</b> Mutation table of variants from PANCE of T7-DdCBE-DddA1 for expanded targeting scope                                                        | 7      |
| <b>Supplementary Table 4.</b> Mutation table of variants from the PACE evolution to expand targeting scope                                                                | 8      |
| <b>Supplementary Table 5.</b> Sequencing coverage for ATAC-seq samples                                                                                                    | Excel  |
| <b>Supplementary Table 6.</b> List of predicted off-target nuclear DNA sites for SIRT6-DdCBE and JAK2-DdCBE Mutation table of variants from the <u>GC</u> -specific PANCE | Excel  |
| <b>Supplementary Table 7.</b> Mutation table of variants from the <u>GC</u> -specific PANCE                                                                               | 11     |
| <b>Supplementary Table 8.</b> Amplicons for high-throughput sequencing analyses                                                                                           | 12-15  |
| <b>Supplementary Table 9.</b> List of bacterial plasmids used in this work                                                                                                | 16-17  |
| <b>Supplementary Table 10.</b> List of DNA sequences recognized by TALE proteins                                                                                          | 18     |
| <b>Supplementary Table 11.</b> Primers used for mammalian and bacteria cell genomic DNA amplification at sites targeted by DdCBEs                                         | 19-20  |

|                                                                                                                                          |       |
|------------------------------------------------------------------------------------------------------------------------------------------|-------|
| <b>Supplementary Table 12.</b> Sequences of unique molecular identifiers associated with each target plasmid                             | 21    |
| <b>Supplementary Sequences 1.</b> TALE sequences used in DdCBEs                                                                          | 22-27 |
| <b>Supplementary Sequences 2.</b> Sequences of full-length DddA variants                                                                 | 28-29 |
| <b>Supplementary Sequences 3.</b> Sequences used for fluorescence-activated cell sorting of DdCBE-expressing cells                       | 30    |
| <b>Supplementary Note 1.</b> Mitochondrial editing efficiencies of DdCBEs containing a mismatched or non-mismatched terminal TALE repeat | 31    |
| <b>Supplementary Note 2.</b> Representative FACS gating plots for eGFP <sup>+</sup> /mCherry <sup>+</sup> cells                          | 32-33 |
| <b>Supplementary Note 3.</b> Nuclear editing efficiencies of DdCBEs containing N-terminal UGI fusions or C-terminal UGI fusions          | 34    |
| <b>Supplementary References</b>                                                                                                          | 35    |

### *Further evolution of T7-DdCBE-DddA11 for improved GC activity*

We previously performed a PANCE of canonical T7-DdCBE using a strains 9 and 10 transformed with MP6. These strains expressed the GCA or GCG linker, respectively (**Extended Data Fig. 7a**). After fifteen passages, the overnight fold phage propagation increased to 1,000, representing >1,000-fold improvement. Clonal sequencing of phage isolated at the end of PANCE, however, revealed a stochastic frameshift mutation within the open reading frame encoding either the left- or right-half of T7-DdCBE (data not shown, available upon request). We speculated that the premature stop codons helped improve phage fitness by reducing the translational burden on the phage, thus increasing phage propagation in a manner that was independent of the deamination activity of DddA. Given that DddA11 already exhibited a broadened targeting scope and non-zero GC activity (**Fig. 6b**), we hypothesized that DddA11 could be a promising evolutionary stepping-stone to serve as a starting target for evolving DddA variants towards higher GC activity.

We initiated PANCE of T7-DdCBE containing DddA11 in duplicates using the same MP6-transformed strains 9 and 10. One replicate in PANCE-GCA and one replicate PANCE-GCG evolved ‘cheaters’ in which gIII was recombined into the phage genome. The PANCE schedules shown in **Extended Data Fig. 7d** are for the other replicates that do not contain gIII within the SP genome. We isolated six to eight plaques from each replicate after round 9 and round 12 for clonal sequencing. The mutation N1378S was strongly enriched in PANCE-GCA and PANCE-GCG. One replicate of PANCE-GCA also showed strong consensus for the additional mutations A1341I and P1394S (**Supplementary Table 7**).

We selected two strongly enriched genotypes (7.9.1 and 7.12.1) and two moderately enriched genotypes (7.12.2 and 7.12.3) for validation of mtDNA base editing activity in human cells (**Extended Data Fig. 8a**). Variant 7.12.1 generally resulted in a 2.2- to 27-fold decline in AC and CC editing compared to DddA11 (**Extended Data Fig. 8b-e**). Variants 7.9.1, 7.12.2, and 7.12.3 improved TC and non-TC editing by 1.4- to 1.6-fold when tested as ND4.3-DdCBE, but did not enhance GC editing compared to DddA11 (**Extended Data Fig. 8b**). ND5.4-DdCBE containing variant 7.9.1 resulted in comparable editing to DddA11 at AC and CC targets (**Extended Data Fig. 8c**). When

tested at other sites, variants 7.9.1, 7.12.2, and 7.12.3 improved TC editing by an average of 1.2-fold compared to DddA11. These variants, however, generally resulted in lower non-TC compared to DddA11 when tested as ND5.2-DdCBE and ATP8-DdCBE (**Extended Data Fig. 8d and 8e**).

### *Structure alignment of DddA to APOBEC3G*

Our previous work identified ssDNA-specific APOBEC3G cytidine deaminase, which has an intrinsic 5'-CC preference<sup>45</sup>, as the closest structural relative to DddA. We aligned the catalytic domain of human APOBEC3G complexed with its ssDNA 5'-CCA substrate<sup>46</sup> with DNA-free DddA. The PACE-derived DddA variants DddA8 and DddA11 expanded the putative TC sequence preference to include AC and CC (**Fig. 3b**). These variants contained mutations A1341V, N1342S, G1344R and G1344S that are positioned within a loop that aligns most closely to loop 3 of APOBEC3G (**Extended Data Fig. 10a and 10b**). Previous studies identified DNA-binding loop 3 to be critical for enhancing the catalytic activity of APOBEC3G at 5'CC<sup>47</sup>. In this study, the N1342S nucleotide substitution in DddA11e increased TC editing by 1.3-fold and yielded low but detectable AC and CC editing (**Fig. 3f**). These results suggest that the DddA loop containing N1342 could be engineered to improve the catalytic activity of DddA and support deamination at non-TC contexts.

In APOBEC3G, residue D317 in loop 7 is critical for selectivity towards C.<sup>147</sup> (**Extended Data Fig. 10b**). Context-specific PANCE of DddA strongly enriched for E1370K across all tested linkers of ACC, CCC and GCC (**Supplementary Table 3**). Given that loop 7 of APOBEC3G spatially aligns with the DddA loop containing E1370K, E1370K could also be involved in altering the substrate selectivity of DddA (**Extended Data Fig. 10b**).

**Supplementary Table 1 | Mutation table of variants from PANCE of canonical T7-DdCBE for improved TC activity.** Strain 4 transformed with MP6 was infected with input SP encoding the canonical T7-DdCBE (see Extended Data Fig. 1a). Four plaques from each replicate (A, B, C and D) were sequenced after 7 passages. Mutations are highlighted in blue. Genotypes in red were tested for mitochondrial base editing in human cells (see Extended Data Fig. 1d).

| Position | DddA-1397-N |      |      |      |      |      |      |      |      |      | DddA-G1397-C |      |      |      |      |
|----------|-------------|------|------|------|------|------|------|------|------|------|--------------|------|------|------|------|
|          | 1307        | 1320 | 1321 | 1326 | 1330 | 1364 | 1372 | 1379 | 1380 | 1394 | 1396         | 1368 | 1399 | 1409 | 1418 |
| wt       | Y           | D    | A    | S    | S    | V    | T    | M    | T    | P    | E            | L    | I    | T    | S    |
| A.1      | Y           | D    | A    | S    | S    | V    | I    | M    | T    | P    | E            | L    | I    | T    | S    |
| A.2      | Y           | D    | A    | S    | S    | V    | T    | M    | I    | P    | E            | L    | I    | T    | S    |
| A.3      | Y           | D    | A    | S    | I    | V    | I    | M    | T    | P    | E            | L    | I    | T    | S    |
| A.4      | Y           | D    | A    | S    | S    | V    | I    | M    | T    | P    | E            | L    | I    | T    | S    |
| B.1      | Y           | D    | A    | I    | S    | V    | T    | M    | T    | S    | E            | L    | I    | I    | R    |
| B.2      | Y           | N    | A    | I    | S    | V    | T    | M    | T    | S    | E            | F    | I    | I    | S    |
| B.3      | Y           | N    | A    | S    | S    | V    | T    | I    | T    | P    | E            | L    | I    | T    | S    |
| B.4      | Y           | D    | T    | I    | S    | V    | T    | M    | T    | S    | E            | L    | I    | I    | S    |
| C.1      | Y           | D    | A    | S    | S    | V    | T    | M    | I    | P    | E            | L    | I    | T    | S    |
| C.2      | Y           | D    | A    | S    | S    | V    | T    | M    | I    | P    | E            | L    | I    | T    | S    |
| C.3      | H           | D    | A    | S    | S    | L    | T    | M    | T    | P    | E            | L    | I    | T    | S    |
| C.4      | Y           | D    | A    | S    | S    | V    | T    | M    | I    | P    | E            | L    | S    | T    | S    |
| D.1      | Y           | D    | A    | S    | S    | V    | T    | I    | T    | P    | E            | L    | I    | T    | S    |
| D.2      | Y           | D    | A    | S    | S    | V    | I    | M    | T    | P    | E            | L    | I    | T    | S    |
| D.3      | Y           | D    | A    | S    | S    | V    | T    | I    | T    | P    | E            | L    | I    | T    | S    |
| D.4      | Y           | D    | A    | S    | S    | V    | T    | M    | I    | P    | K            | L    | I    | T    | S    |

**Supplementary Table 2 | Mutation table of variants from PACE of T7-DdCBE-DddA1 for improved TC activity.** Strain 4 transformed with MP6 was infected with SP encoding T7-DdCBE-DddA1 (see Extended Data Fig. 1a). Individual plaques were isolated at the end of PACE and sequenced for their DddA genes. Genotypes in red were tested for mitochondrial base editing in human cells (see Fig. 2a).

| Position              | DddA -G1397-N |      |      |      |      |      |      |      |      |      | DddA-G1397-C |
|-----------------------|---------------|------|------|------|------|------|------|------|------|------|--------------|
|                       | 1310          | 1314 | 1320 | 1326 | 1330 | 1370 | 1380 | 1389 | 1396 | 1413 | 1417         |
| <b>Wildtype</b>       | Q             | T    | D    | S    | S    | E    | T    | K    | E    | T    | N            |
| <b>T7-DdCBE-DddA1</b> | Q             | T    | D    | S    | S    | E    | I    | K    | E    | T    | N            |
| A.1                   | Q             | T    | D    | I    | S    | E    | I    | K    | K    | T    | N            |
| A.2                   | Q             | T    | D    | S    | S    | E    | I    | K    | K    | T    | N            |
| <b>A.3</b>            | Q             | A    | D    | S    | S    | E    | I    | K    | K    | T    | N            |
| A.4                   | Q             | A    | D    | S    | S    | G    | I    | K    | K    | T    | N            |
| A.5                   | Q             | A    | D    | S    | S    | E    | I    | K    | K    | T    | N            |
| A.6                   | Q             | A    | D    | S    | S    | E    | I    | K    | K    | T    | N            |
| A.7                   | Q             | A    | D    | S    | S    | E    | I    | K    | K    | T    | N            |
| B.1                   | Q             | T    | D    | S    | S    | E    | I    | K    | E    | T    | N            |
| B.2                   | Q             | T    | D    | S    | S    | E    | I    | K    | E    | T    | N            |
| <b>B.3</b>            | Q             | A    | D    | S    | S    | E    | I    | K    | E    | T    | N            |
| B.4                   | Q             | A    | D    | S    | S    | E    | I    | K    | E    | T    | N            |
| B.5                   | Q             | T    | D    | S    | S    | E    | I    | K    | E    | T    | N            |
| B.6                   | Q             | T    | D    | S    | S    | E    | I    | K    | E    | T    | N            |
| B.7                   | Q             | T    | D    | S    | S    | E    | I    | K    | E    | T    | N            |
| B.8                   | Q             | T    | D    | S    | S    | E    | I    | K    | E    | T    | N            |
| <b>C.1</b>            | Q             | T    | D    | S    | S    | E    | I    | K    | E    | I    | N            |
| C.2                   | Q             | T    | D    | S    | S    | E    | I    | Q    | E    | I    | N            |
| C.3                   | Q             | T    | D    | S    | S    | E    | I    | K    | E    | I    | N            |
| C.4                   | Q             | T    | D    | S    | S    | E    | I    | K    | E    | T    | N            |
| C.5                   | Q             | T    | D    | S    | S    | E    | I    | K    | E    | T    | N            |
| C.6                   | Q             | T    | D    | S    | I    | E    | I    | K    | G    | T    | N            |
| C.7                   | Q             | T    | D    | S    | S    | E    | I    | K    | E    | I    | N            |
| <b>D.2</b>            | R             | T    | D    | S    | I    | E    | I    | K    | E    | T    | N            |
| D.3                   | R             | T    | D    | S    | I    | E    | I    | K    | E    | T    | N            |
| D.5                   | R             | T    | D    | S    | I    | E    | I    | K    | E    | T    | K            |
| D.6                   | Q             | T    | N    | S    | I    | E    | I    | K    | E    | T    | N            |
| D.7                   | Q             | A    | D    | S    | S    | E    | I    | K    | E    | T    | N            |
| D.8                   | R             | T    | D    | S    | I    | E    | I    | K    | E    | T    | N            |

**Supplementary Table 3 | Mutation table of variants from PANCE of T7-DdCBE-DddA1 for expanded targeting scope.** Strains 5, 6 or 7, which were each transformed with MP6, were used for PANCE-ACC, PANCE-CCC or PANCE-GCC, respectively (see Extended Data Fig. 3a for strain identities). Each host strain was infected with input SP encoding T7-DdCBE-DddA1. Plaques from each replicate (A, B, C and D) were sequenced after 9 passages. Mutations are highlighted in blue. Phage lagoons highlighted in red were used as inputs for PACE.

| Position       | DddA:G1397-N |      |      |      |      |      |      |      |      |      |      |      |      |      | DddA:G1397-C |      |      |      |      |      |      |      |   |   |
|----------------|--------------|------|------|------|------|------|------|------|------|------|------|------|------|------|--------------|------|------|------|------|------|------|------|---|---|
|                | 1290         | 1299 | 1300 | 1301 | 1310 | 1314 | 1320 | 1321 | 1325 | 1328 | 1330 | 1334 | 1341 | 1342 | 1344         | 1364 | 1370 | 1380 | 1406 | 1413 | 1421 | 1425 |   |   |
| WT/type        | G            | I    | S    | A    | Q    | T    | D    | A    | S    | V    | S    | P    | A    | N    | G            | V    | E    | T    | A    | T    | T    | S    | G |   |
| T7-DdCBE-DddA1 | G            | I    | S    | A    | Q    | T    | D    | A    | S    | V    | S    | P    | A    | N    | G            | V    | E    | T    | A    | T    | T    | S    | G |   |
| ACC-A.8        | G            | I    | S    | A    | Q    | A    | D    | A    | S    | V    | S    | P    | A    | N    | G            | V    | K    | I    | A    | T    | T    | S    | G |   |
| ACC-B.1        | G            | I    | S    | A    | Q    | T    | D    | A    | S    | V    | S    | P    | A    | S    | G            | V    | K    | I    | A    | T    | T    | S    | G |   |
| ACC-B.2        | G            | I    | S    | A    | Q    | T    | D    | A    | S    | V    | S    | P    | A    | S    | G            | V    | K    | I    | A    | T    | T    | S    | G |   |
| ACC-B.3        | G            | I    | S    | A    | Q    | T    | D    | A    | S    | V    | S    | P    | A    | N    | G            | V    | K    | I    | A    | T    | T    | S    | G |   |
| ACC-B.4        | G            | I    | S    | A    | Q    | T    | D    | A    | S    | V    | S    | P    | A    | S    | G            | V    | K    | I    | A    | T    | T    | S    | G |   |
| ACC-B.6        | G            | I    | S    | A    | Q    | T    | D    | A    | S    | V    | S    | P    | A    | S    | G            | V    | K    | I    | A    | T    | T    | S    | G |   |
| ACC-B.7        | G            | I    | S    | A    | Q    | I    | D    | A    | S    | V    | S    | P    | A    | S    | G            | V    | K    | I    | A    | T    | T    | S    | G |   |
| ACC-C.1        | G            | I    | S    | A    | Q    | T    | D    | A    | S    | V    | S    | P    | A    | N    | G            | V    | K    | I    | A    | T    | T    | S    | G |   |
| ACC-C.2        | G            | I    | S    | A    | Q    | A    | D    | A    | S    | V    | S    | P    | A    | N    | G            | V    | K    | I    | A    | T    | T    | S    | G |   |
| ACC-C.3        | G            | I    | S    | A    | Q    | A    | D    | A    | S    | V    | S    | P    | A    | N    | G            | V    | K    | I    | A    | T    | T    | S    | G |   |
| ACC-C.4        | G            | I    | S    | A    | Q    | A    | D    | A    | S    | V    | S    | P    | A    | N    | G            | V    | K    | I    | A    | T    | T    | S    | G |   |
| ACC-C.5        | G            | V    | I    | S    | A    | Q    | A    | D    | A    | S    | V    | S    | P    | A    | N            | G    | V    | K    | I    | A    | T    | T    | S | G |
| ACC-C.6        | G            | I    | S    | A    | Q    | A    | D    | A    | S    | V    | S    | P    | A    | N    | G            | V    | K    | I    | A    | T    | T    | S    | G |   |
| ACC-C.8        | G            | I    | S    | A    | Q    | A    | D    | A    | S    | V    | S    | P    | A    | N    | G            | V    | K    | I    | A    | T    | T    | S    | G |   |
| ACC-D.1        | G            | I    | S    | A    | Q    | T    | D    | A    | S    | V    | I    | P    | A    | N    | G            | V    | K    | I    | A    | T    | T    | S    | G |   |
| ACC-D.2        | G            | I    | S    | A    | Q    | T    | D    | A    | S    | V    | I    | P    | A    | N    | G            | V    | K    | I    | A    | T    | T    | S    | G |   |
| ACC-D.3        | G            | I    | S    | A    | Q    | T    | D    | A    | S    | V    | S    | P    | A    | N    | G            | V    | K    | I    | A    | T    | T    | S    | G |   |
| ACC-D.4        | G            | I    | S    | A    | Q    | T    | D    | A    | S    | V    | S    | P    | A    | N    | G            | V    | K    | I    | A    | T    | T    | S    | G |   |
| ACC-D.5        | G            | I    | S    | A    | Q    | T    | D    | A    | S    | V    | S    | P    | A    | N    | G            | V    | K    | I    | A    | T    | T    | S    | G |   |
| ACC-D.6        | G            | I    | S    | A    | Q    | T    | D    | A    | S    | V    | S    | P    | A    | N    | G            | V    | K    | I    | A    | T    | T    | S    | G |   |
| ACC-D.7        | G            | I    | S    | A    | Q    | T    | D    | A    | S    | V    | S    | P    | A    | N    | G            | V    | K    | I    | A    | T    | T    | S    | G |   |
| ACC-D.8        | G            | I    | S    | A    | Q    | T    | D    | A    | S    | V    | S    | P    | A    | N    | G            | V    | K    | I    | A    | T    | T    | S    | G |   |
| CCC-A.1        | G            | I    | S    | A    | Q    | T    | D    | A    | S    | V    | S    | P    | A    | S    | G            | V    | K    | I    | A    | T    | T    | S    | G |   |
| CCC-A.2        | G            | I    | S    | A    | Q    | T    | D    | A    | S    | V    | S    | P    | A    | S    | G            | V    | K    | I    | A    | T    | T    | S    | G |   |
| CCC-A.3        | G            | I    | S    | A    | Q    | T    | D    | A    | S    | V    | S    | P    | A    | S    | G            | V    | K    | I    | A    | T    | T    | S    | G |   |
| CCC-A.4        | G            | I    | S    | A    | Q    | T    | D    | A    | S    | V    | S    | P    | S    | A    | S            | G    | V    | K    | I    | A    | T    | T    | S | G |
| CCC-A.5        | G            | I    | S    | A    | Q    | T    | D    | A    | S    | V    | S    | P    | A    | S    | G            | V    | K    | I    | A    | T    | T    | S    | G |   |
| CCC-A.6        | G            | I    | S    | A    | Q    | T    | D    | A    | S    | V    | S    | P    | A    | S    | G            | V    | K    | I    | A    | T    | T    | S    | G |   |
| CCC-A.7        | G            | I    | S    | A    | Q    | T    | D    | A    | S    | V    | S    | P    | A    | S    | G            | V    | K    | I    | A    | T    | T    | S    | G |   |
| CCC-A.8        | G            | I    | S    | A    | Q    | T    | D    | A    | S    | V    | S    | P    | A    | S    | G            | V    | K    | I    | A    | T    | T    | S    | G |   |
| CCC-B.1        | G            | I    | S    | A    | Q    | T    | D    | A    | S    | V    | S    | P    | A    | N    | R            | M    | K    | I    | A    | T    | T    | S    | G |   |
| CCC-B.2        | G            | I    | S    | A    | Q    | T    | D    | A    | S    | V    | S    | P    | A    | N    | R            | M    | K    | I    | A    | T    | T    | S    | G |   |
| CCC-B.3        | G            | I    | S    | A    | Q    | T    | D    | A    | S    | V    | S    | P    | A    | N    | R            | M    | K    | I    | A    | T    | T    | S    | G |   |
| CCC-B.4        | G            | I    | S    | A    | Q    | T    | D    | A    | S    | V    | S    | P    | A    | N    | R            | M    | K    | I    | A    | T    | T    | S    | G |   |
| CCC-B.5        | G            | I    | S    | A    | Q    | T    | D    | A    | S    | V    | S    | P    | A    | N    | R            | M    | K    | I    | A    | T    | T    | S    | G |   |
| CCC-B.6        | G            | I    | S    | A    | Q    | T    | D    | A    | S    | V    | S    | P    | A    | N    | R            | M    | K    | I    | A    | T    | T    | S    | G |   |
| CCC-B.7        | G            | I    | S    | A    | Q    | T    | D    | A    | S    | V    | S    | P    | A    | N    | R            | M    | K    | I    | A    | T    | T    | S    | G |   |
| CCC-B.8        | G            | I    | S    | A    | Q    | T    | D    | A    | S    | V    | S    | P    | A    | N    | R            | M    | K    | I    | A    | T    | T    | S    | G |   |
| CCC-C.1        | G            | I    | S    | A    | Q    | T    | D    | A    | S    | V    | S    | P    | T    | S    | G            | V    | K    | I    | A    | T    | T    | S    | G |   |
| CCC-C.2        | G            | I    | S    | A    | Q    | T    | D    | A    | S    | V    | S    | P    | T    | S    | G            | V    | K    | I    | A    | T    | T    | S    | G |   |
| CCC-C.3        | G            | I    | S    | A    | Q    | T    | D    | A    | S    | V    | S    | P    | T    | S    | G            | V    | K    | I    | A    | T    | T    | S    | G |   |
| CCC-C.4        | G            | I    | S    | A    | K    | T    | D    | A    | S    | V    | I    | P    | A    | N    | G            | V    | K    | I    | A    | T    | T    | S    | G |   |
| CCC-C.5        | G            | I    | S    | A    | Q    | T    | D    | A    | S    | V    | S    | P    | T    | S    | G            | V    | K    | I    | A    | T    | T    | S    | G |   |
| CCC-C.6        | G            | I    | S    | A    | Q    | T    | D    | A    | S    | V    | S    | P    | T    | S    | G            | V    | K    | I    | A    | T    | T    | S    | G |   |
| CCC-C.7        | G            | I    | S    | A    | Q    | T    | D    | A    | S    | V    | S    | P    | T    | S    | G            | V    | K    | I    | A    | T    | T    | S    | G |   |
| CCC-C.8        | G            | I    | S    | A    | Q    | T    | D    | A    | S    | V    | S    | P    | T    | S    | G            | V    | K    | I    | A    | T    | T    | S    | G |   |
| CCC-D.1        | G            | I    | S    | A    | Q    | T    | D    | A    | S    | V    | S    | P    | V    | N    | G            | V    | K    | I    | A    | T    | T    | S    | G |   |
| CCC-D.2        | G            | I    | S    | A    | Q    | T    | D    | A    | S    | V    | S    | P    | V    | S    | G            | V    | K    | I    | A    | T    | T    | S    | G |   |
| CCC-D.3        | G            | I    | S    | A    | Q    | T    | D    | A    | S    | V    | S    | P    | V    | S    | G            | V    | K    | I    | A    | T    | T    | S    | G |   |
| CCC-D.4        | G            | I    | S    | A    | Q    | T    | D    | A    | S    | V    | S    | P    | V    | S    | G            | V    | E    | K    | I    | A    | T    | T    | S | G |
| CCC-D.5        | G            | I    | S    | A    | Q    | T    | D    | A    | S    | V    | S    | P    | V    | S    | G            | V    | K    | I    | A    | T    | T    | S    | G |   |
| CCC-D.6        | G            | I    | S    | A    | Q    | T    | D    | A    | S    | V    | S    | P    | V    | S    | G            | V    | K    | I    | A    | T    | T    | S    | G |   |
| CCC-D.7        | G            | I    | S    | A    | Q    | T    | D    | A    | S    | V    | S    | P    | V    | S    | G            | V    | K    | I    | A    | T    | T    | S    | G |   |
| CCC-D.8        | G            | I    | S    | A    | Q    | T    | D    | A    | S    | V    | S    | P    | V    | S    | G            | V    | K    | I    | A    | T    | T    | S    | G |   |
| GCC-A.1        | G            | I    | S    | A    | Q    | T    | D    | A    | S    | V    | I    | P    | V    | N    | G            | V    | K    | I    | A    | T    | T    | S    | G |   |
| GCC-A.2        | G            | I    | S    | A    | Q    | T    | D    | A    | S    | V    | I    | P    | V    | S    | G            | V    | K    | I    | A    | T    | T    | S    | G |   |
| GCC-A.3        | G            | I    | S    | A    | Q    | T    | D    | A    | S    | V    | I    | P    | V    | S    | G            | V    | K    | I    | A    | T    | T    | S    | G |   |
| GCC-A.4        | G            | I    | S    | A    | Q    | T    | D    | A    | S    | V    | S    | P    | V    | S    | G            | V    | K    | I    | A    | T    | T    | S    | G |   |
| GCC-A.5        | G            | I    | S    | A    | Q    | T    | D    | A    | S    | V    | I    | P    | V    | S    | G            | V    | K    | I    | A    | T    | T    | S    | G |   |
| GCC-A.6        | G            | I    | S    | A    | Q    | T    | D    | A    | S    | V    | S    | P    | V    | S    | G            | V    | K    | I    | A    | T    | T    | S    | G |   |
| GCC-A.7        | G            | I    | S    | A    | Q    | T    | D    | A    | S    | V    | S    | P    | V    | N    | G            | V    | K    | I    | A    | T    | T    | S    | G |   |
| GCC-A.8        | G            | I    | S    | A    | Q    | T    | N    | A    | S    | V    | I    | P    | V    | S    | G            | V    | K    | I    | A    | T    | T    | S    | G |   |
| GCC-B.1        | G            | I    | S    | T    | Q    | T    | D    | A    | N    | V    | S    | P    | A    | N    | S            | V    | K    | I    | A    | T    | T    | S    | G |   |
| GCC-B.2        | G            | I    | S    | A    | Q    | T    | D    | A    | S    | V    | S    | P    | A    | N    | S            | V    | K    | I    | A    | T    | T    | S    | G |   |
| GCC-B.3        | G            | I    | S    | A    | Q    | T    | D    | A    | S    | V    | S    | P    | A    | N    | S            | V    | K    | I    | A    | T    | T    | S    | G |   |
| GCC-B.4        | G            | I    | S    | A    | Q    | T    | D    | A    | S    | V    | S    | P    | A    | N    | S            | V    | K    | I    | A    | T    | T    | S    | G |   |
| GCC-B.5        | G            | I    | S    | A    | Q    | V    | D    | A    | S    | V    | S    | P    | A    | N    | S            | V    | K    | I    | A    | T    | T    | S    | G |   |
| GCC-B.6        | G            | I    | S    | A    | Q    | T    | N    | A    | S    | V    | S    | P    | A    | N    | S            | V    | K    | I    | A    | T    | T    | S    | G |   |
| GCC-B.7        | G            | I    | S    | A    | Q    | A    | D    | A    | S    | V    | S    | P    | A    | N    | S            | V    | K    | I    | A    | T    | T    | S    | G |   |
| GCC-B.8        | G            | I    | S    | A    | Q    | T    | D    | A    | S    | V    | S    | P    | A    | N    | S            | V    | K    | I    | A    | T    | T    | S    | G |   |
| GCC-C.1        | G            | I    | S    | A    | Q    | T    | D    | A    | S    | V    | S    | P    | A    | N    | G            | V    | K    | I    | A    | T    | T    | S    | G |   |
| GCC-C.2        | G            | I    | S    | A    | Q    | T    | D    | A    | S    | V    | S    | P    | A    | N    | S            | V    | K    | I    | A    | T    | T    | S    | G |   |
| GCC-C.3        | G            | I    | S    | A    | Q    | T    | D    | A    | S    | V    | S    | P    | A    | N    | S            | V    | K    | I    | A    | T    | T    | S    | G |   |
| GCC-C.4        | G            | I    | S    | A    | Q    | T    | D    | A    | S    | V    | S    | P    | A    | N    | S            | V    | K    | I    | A    | T    | T    | S    | G |   |
| GCC-C.5        | G            | I    | S    | A    | Q    | T    | D    | A    | S    | V    | S    | P    | A    | N    | S            | V    | K    | I    | A    | T    | T    | S    | G |   |
| GCC-C.6        | G            | I    | S    | A    | Q    | T    | D    | A    | S    | V    | S    | P    | A    | N    | S            | V    | K    | I    | A    | T    | T    | S    | G |   |
| GCC-C.7        | G            | I    | S    | A    | Q    | T    | D    | A    | S    | V    | S    | P    | A    | N    | S            | V    | K    | I    | A    | T    | T    | S    | G |   |
| GCC-C.8        | G            | I    | R    | A    | Q    | T    | D    | A    | S    | V    | S    | P    | A    | N    | S            | V    | K    | I    | A    | T    | T    | S    | G |   |
| GCC-D.1        | G            | I    | S    | A    | Q    | T    | D    | A    | S    | V    | S    | P    | T    | S    | G            | V    | K    | I    | A    | T    | T    | S    | G |   |
| GCC-D.2        | G            | I    | S    | A    | Q    | T    | D    | T    | A    | S    | V    | S    | P    | A    | N            | S    | V    | K    | I    | T    | T    | T    | S | G |
| GCC-D.3        | G            | I    | S    | A    | Q    | T    | D    | A    | S    | V    | S    | P    | A    | N    | S            | V    | K    | I    | T    | T    | T    | S    | G |   |
| GCC-D.4        | G            | I    | S    | A    | Q    | T    | D    | A    | S    | V    | S    | P    | A    | N    | S            | V    | K    | I    | A    | T    | T    | S    | G |   |
| GCC-D.5        | V            | I    | S    | A    | Q    | T    | N    | A    | S    | V    | S    | P    | A    | N    | S            | V    | K    | I    | A    | T    | T    | S    | G |   |
| GCC-D.6        | G            | I    | S    | A    | Q    | T    | D    | A    | S    | V    | S    | P    | A    | N    | S            | V    | K    | I    | A    | T    | T    | S    | G |   |
| GCC-D.7        | G            | I    | S    | A    | Q    | T    | D    | A    | S    | V    | S    | P    | A    | N    | S            | V    | K    | I    | A    | T    | T    | S    | G |   |
| GCC-D.8        | G            | I    | S    | A    | Q    | T    | D    | A    | S    | V    | S    | P    | A    | N    | S            | V    | K    | I    | A    | T    | T    | S    | G |   |



**Supplementary Table 4 | Mutation table of variants from the PACE evolution to expand targeting scope.** Host strain 6 transformed with MP6 was infected with the phage population CCC-B from PANCE. Host strain 7 transformed with MP6 was infected either phage population GCC-A or GCC-D from, both of which were derived from PANCE (see Extended Data Fig. 3a for strain identities). The consensus genotypes of input phage populations from PANCE are shown. Data was obtained by sequencing individual plaques isolated at the end of PACE. Genotypes in red were tested for base editing in mammalian cells (see Fig. 3c). †T1413I was included in this genotype.

|       |                  | DddA-G1397N |      |      |      |      |      |      |      |      |      |      |      |      |      | DddA-G1397-C |      |      |      |      |      |      |      |
|-------|------------------|-------------|------|------|------|------|------|------|------|------|------|------|------|------|------|--------------|------|------|------|------|------|------|------|
|       |                  | 1301        | 1314 | 1321 | 1323 | 1325 | 1326 | 1329 | 1330 | 1341 | 1342 | 1344 | 1364 | 1370 | 1377 | 1380         | 1396 | 1398 | 1404 | 1407 | 1410 | 1413 | 1417 |
|       | <b>Position</b>  | A           | T    | A    | G    | E    | S    | F    | S    | A    | N    | G    | V    | E    | V    | T            | E    | A    | G    | G    | K    | T    | N    |
|       | <b>Wild-type</b> | A           | T    | A    | G    | E    | S    | F    | S    | A    | N    | G    | V    | E    | V    | T            | E    | A    | G    | G    | K    | T    | N    |
| PANCE | CCC-B            | A           | T    | A    | G    | E    | S    | F    | S    | A    | N    | R    | M    | K    | V    | I            | E    | A    | G    | G    | K    | T    | N    |
|       | CCC-B.1          | A           | A    | A    | G    | E    | S    | F    | S    | A    | N    | R    | M    | K    | V    | I            | E    | A    | G    | G    | K    | I    | N    |
|       | CCC-B.2          | A           | T    | A    | G    | A    | S    | F    | S    | A    | S    | R    | M    | K    | V    | I            | E    | A    | G    | G    | K    | I    | N    |
| PACE  | CCC-B.3          | A           | A    | E    | S    | E    | S    | F    | S    | A    | N    | R    | M    | K    | V    | I            | E    | A    | G    | G    | K    | T    | N    |
|       | CCC-B.4          | A           | T    | A    | G    | E    | S    | F    | S    | A    | S    | R    | M    | K    | V    | I            | E    | A    | G    | G    | K    | I    | N    |
|       | CCC-B.5          | A           | T    | A    | G    | E    | S    | F    | S    | A    | N    | G    | V    | V    | V    | I            | E    | A    | G    | D    | K    | I    | N    |
|       | CCC-B.6          | S           | T    | A    | G    | E    | S    | F    | S    | A    | N    | R    | M    | K    | V    | I            | E    | A    | G    | G    | K    | I    | S    |
| PANCE | GCC-A            | A           | T    | A    | G    | E    | S    | F    | I    | V    | S    | G    | V    | K    | V    | I            | E    | A    | G    | G    | K    | T    | N    |
|       | GCC-A.1†         | A           | T    | A    | G    | E    | S    | F    | I    | V    | S    | G    | V    | K    | V    | I            | E    | A    | G    | G    | K    | T    | N    |
|       | GCC-A.2          | A           | T    | E    | G    | E    | S    | F    | I    | V    | S    | G    | V    | K    | V    | I            | E    | A    | G    | G    | K    | T    | N    |
|       | GCC-A.3          | A           | T    | A    | G    | E    | S    | F    | I    | V    | S    | G    | V    | K    | V    | I            | E    | A    | G    | G    | K    | T    | N    |
| PACE  | GCC-A.4          | A           | T    | A    | G    | E    | S    | F    | I    | V    | S    | G    | V    | K    | V    | I            | E    | A    | G    | G    | K    | T    | N    |
|       | GCC-A.5          | A           | T    | A    | G    | E    | S    | F    | I    | V    | S    | G    | V    | K    | V    | I            | E    | A    | G    | G    | K    | T    | N    |
|       | GCC-A.6          | A           | T    | A    | G    | E    | S    | F    | I    | V    | S    | G    | V    | K    | V    | I            | E    | A    | G    | G    | K    | T    | N    |
|       | GCC-A.7          | A           | T    | A    | G    | E    | S    | F    | I    | V    | S    | G    | V    | K    | V    | I            | E    | A    | G    | G    | K    | T    | N    |
|       | GCC-A.8          | A           | T    | A    | G    | E    | S    | F    | I    | V    | S    | G    | V    | K    | M    | I            | E    | A    | G    | G    | K    | T    | N    |
| PANCE | GCC-D            | A           | T    | A    | G    | E    | S    | F    | S    | A    | N    | S    | V    | K    | V    | I            | E    | T    | G    | G    | K    | T    | N    |
|       | GCC-D.1          | A           | A    | A    | G    | E    | S    | F    | S    | A    | N    | S    | V    | K    | V    | I            | G    | T    | G    | G    | R    | T    | N    |
|       | GCC-D.2          | A           | A    | A    | G    | E    | S    | F    | S    | A    | N    | S    | V    | K    | V    | I            | E    | A    | G    | G    | K    | T    | N    |
|       | GCC-D.3          | A           | A    | A    | G    | E    | S    | F    | S    | A    | N    | S    | V    | K    | V    | I            | E    | A    | G    | G    | K    | T    | N    |
| PACE  | GCC-D.4          | A           | A    | A    | G    | E    | S    | F    | S    | A    | N    | S    | V    | K    | V    | I            | E    | T    | G    | G    | K    | T    | N    |
|       | GCC-D.5          | A           | A    | A    | G    | E    | S    | F    | S    | A    | N    | S    | V    | K    | V    | I            | K    | T    | G    | G    | K    | I    | N    |
|       | GCC-D.6          | A           | A    | A    | G    | E    | S    | F    | S    | A    | N    | S    | V    | K    | V    | I            | E    | T    | G    | G    | K    | I    | N    |
|       | GCC-D.7          | A           | T    | A    | G    | E    | S    | F    | S    | A    | N    | S    | V    | K    | V    | I            | E    | T    | G    | G    | K    | I    | N    |
|       | GCC-D.8          | A           | T    | A    | G    | E    | V    | L    | S    | A    | N    | S    | V    | K    | V    | I            | K    | T    | G    | G    | K    | I    | N    |

(See the separately provided Excel file.)

**Supplementary Table 5 | Sequencing coverage for ATAC-seq samples.** Sequencing coverages for all replicates in Fig. 3g are provided.

(See the separately provided Excel file.)

**Supplementary Table 6 | List of predicted off-target nuclear DNA sites for SIRT6-DdCBE and JAK2-DdCBE.** TALE off-targets were predicted using the online PROGNOS tool. Off-target sites were ranked based on the RVD nucleotide preferences observed in natural TAL effectors.

**Supplementary Table 7 | Mutation table of variants from the GC-specific PANCE.** Strain 9 transformed with MP6 was used for PANCE-GCA. Strain 10 transformed with MP6 was used for PANCE-GCG (see Extended Data Fig. 7b for strain identities). Each host strain was infected with input SP encoding the DddA11 variant of T7-DdCBE. Plaques were sequenced after nine and 12 passages. Mutations are highlighted in blue.

|           |       | G1397-N |      |       |      |      |      |      |      |       |      |      |      |      |      |      | DddA-C |      |      |      |      |
|-----------|-------|---------|------|-------|------|------|------|------|------|-------|------|------|------|------|------|------|--------|------|------|------|------|
|           |       | 1290    | 1296 | T1311 | 1320 | 1325 | 1326 | 1330 | 1334 | P1336 | 1341 | 1342 | 1349 | 1351 | 1370 | 1378 | 1380   | 1394 | 1413 | 1414 | 1421 |
| Wild-type |       | G       | P    | T     | D    | E    | S    | S    | P    | P     | A    | N    | Q    | A    | E    | N    | T      | P    | T    | G    | S    |
| DddA11    |       | G       | P    | T     | D    | E    | S    | I    | P    | P     | V    | S    | Q    | A    | K    | N    | I      | P    | I    | G    | S    |
| Round 9   | GCA.1 | G       | P    | T     | D    | E    | S    | I    | P    | P     | V    | S    | Q    | A    | K    | N    | I      | P    | I    | G    | S    |
|           | GCA.2 | G       | P    | T     | D    | E    | S    | I    | P    | P     | V    | S    | Q    | A    | K    | N    | I      | P    | I    | G    | S    |
|           | GCA.3 | G       | P    | T     | D    | E    | S    | I    | P    | P     | A    | S    | Q    | T    | K    | N    | I      | P    | I    | G    | S    |
|           | GCA.4 | G       | P    | T     | D    | E    | S    | I    | P    | P     | V    | S    | Q    | A    | K    | N    | I      | P    | I    | S    | S    |
|           | GCA.5 | G       | T    | T     | D    | E    | S    | I    | P    | P     | V    | S    | Q    | A    | K    | N    | I      | P    | I    | G    | S    |
|           | GCA.6 | V       | P    | T     | D    | E    | S    | I    | P    | P     | V    | S    | Q    | A    | K    | N    | I      | P    | I    | G    | S    |
|           | GCA.7 | G       | P    | T     | D    | E    | S    | I    | P    | P     | V    | S    | Q    | A    | K    | N    | I      | P    | I    | G    | S    |
|           | GCA.8 | G       | P    | T     | D    | E    | S    | I    | P    | P     | V    | S    | Q    | A    | K    | N    | I      | P    | I    | G    | S    |
| Round 9   | GCG.1 | G       | P    | A     | D    | K    | S    | I    | P    | P     | V    | S    | Q    | A    | K    | S    | I      | P    | I    | G    | S    |
|           | GCG.2 | G       | P    | T     | D    | K    | S    | I    | P    | P     | V    | S    | Q    | A    | K    | S    | I      | P    | I    | G    | S    |
|           | GCG.3 | G       | P    | T     | D    | E    | S    | I    | P    | P     | V    | S    | Q    | A    | K    | S    | I      | P    | I    | G    | S    |
|           | GCG.4 | G       | P    | T     | D    | E    | S    | I    | P    | P     | V    | S    | Q    | A    | K    | S    | I      | P    | I    | G    | S    |
|           | GCG.5 | G       | P    | T     | D    | E    | S    | I    | P    | P     | V    | S    | Q    | A    | K    | S    | I      | P    | I    | G    | S    |
|           | GCG.6 | G       | P    | T     | D    | E    | S    | I    | P    | P     | V    | S    | Q    | A    | K    | S    | I      | P    | I    | G    | S    |
|           | GCG.7 | G       | P    | T     | D    | K    | S    | I    | P    | P     | V    | S    | Q    | A    | K    | S    | I      | P    | I    | G    | S    |
|           | GCG.8 | G       | P    | T     | D    | E    | S    | I    | S    | P     | V    | S    | Q    | A    | K    | S    | I      | P    | I    | G    | S    |
| Round 12  | GCA.1 | G       | P    | T     | D    | K    | S    | I    | P    | P     | V    | S    | Q    | A    | K    | N    | I      | P    | I    | G    | S    |
|           | GCA.2 | G       | P    | T     | N    | E    | S    | I    | P    | P     | I    | S    | Q    | A    | K    | S    | I      | S    | I    | G    | S    |
|           | GCA.3 | G       | P    | T     | D    | E    | S    | I    | P    | P     | I    | S    | Q    | A    | K    | S    | I      | S    | I    | G    | S    |
|           | GCA.4 | G       | P    | T     | D    | E    | S    | I    | P    | P     | I    | S    | Q    | A    | K    | S    | I      | S    | I    | G    | S    |
|           | GCA.5 | G       | P    | T     | D    | E    | S    | I    | P    | P     | I    | S    | H    | A    | K    | S    | I      | S    | I    | G    | S    |
|           | GCA.6 | G       | P    | T     | D    | E    | S    | I    | P    | P     | I    | S    | H    | A    | K    | S    | I      | S    | I    | G    | S    |
| Round 12  | GCG.1 | G       | P    | T     | D    | K    | S    | I    | P    | P     | V    | S    | Q    | A    | K    | S    | I      | P    | I    | G    | S    |
|           | GCG.2 | G       | P    | T     | D    | E    | S    | I    | S    | S     | V    | S    | Q    | A    | K    | S    | I      | P    | I    | G    | S    |
|           | GCG.3 | G       | P    | T     | D    | E    | S    | I    | P    | P     | V    | S    | Q    | A    | K    | S    | I      | P    | I    | G    | S    |
|           | GCG.4 | G       | P    | T     | D    | E    | S    | I    | P    | P     | V    | S    | Q    | A    | K    | S    | I      | P    | I    | G    | S    |
|           | GCG.5 | G       | P    | T     | D    | K    | S    | I    | P    | P     | V    | S    | Q    | A    | K    | S    | I      | P    | I    | G    | S    |
|           | GCG.6 | G       | P    | T     | D    | E    | S    | I    | S    | P     | V    | S    | Q    | A    | K    | S    | I      | P    | I    | G    | S    |

**Supplementary Table 8** | Amplicons for high-throughput sequencing analyses

| Site                                 | Amplicon                                                                                                                                                                                                                                                                                            |
|--------------------------------------|-----------------------------------------------------------------------------------------------------------------------------------------------------------------------------------------------------------------------------------------------------------------------------------------------------|
| ND1                                  | CTCACCATCGCTCTTCTACTATGAACCCCCCTCCCCATACCCAACCCCCTGGTC<br>AACCTCAACCTAGGCCTCCTATTTATTCTAGCCACCTCTAGCCTAGCCGTTTACT<br>CAATCCTCTGATCAGGGTGAGCATCAAACCTCAAACCTACGCCCTGATCGGCCGCAC<br>TGCGAGCAGTAGCCCAAACAATCTCATATGAAGTCACCCTAGCC                                                                      |
| ND1.2                                | GCCAACCTCCTACTCCTCATTGTACCCATTCTAATCGCAATGGCATTCCCTAATGC<br>TTACCGAACGAAAAATTCTAGGCTATATACAACCTACGCAAAGGCCCAACGTTGT<br>AGGCCCTACGGGCTACTACAACCCTTCGCTGACGCCATAAACTCTTCACCAA<br>AGAGCCCCTAAAACCCGCCACATCTACCATCACCCCTCTACATCACCGCCC                                                                  |
| ND2                                  | CGTAAGCCTTCTCCTCACTCTCTCAATCTTATCCATCATAGCAGGCAGTTGAGGT<br>GGATTAACCAAACCCAGCTACGCAAAATCTTAGCATACTCCTCAATTACCCACA<br>TAGGATGAATAATAGCAGTTCTACCGTACAACCCTAACATAACCATTCTTAATTTA<br>ACTATTTATATTATCCTAACTACTACCGCATTCCCTACTACTCAAC                                                                     |
| ND4                                  | GACTTCAAACCTACTCCCCTAATAAGCTTTTTGATGACTTCTAGCAAGCCTCGC<br>TAACCTCGCCTTACCCCCACTATTAACCTACTGGGAGAACTCTCTGTGCTAGTA<br>ACCACGTTCTCCTGATCAAATATCACTCTCCTACTTACAGGACTCAACATACTAG<br>TCACAGCCCTATACTCCCTCTACATATTTACCACAAC                                                                                |
| ND4.2                                | CTGCCTACGACAAACAGACCTAAAATCGCTCATTGCATACTCTTCAATCAGCCAC                                                                                                                                                                                                                                             |
| ND4.3                                | ATAGCCCTCGTAGTAACAGCCATTCTCATCAAACCCCCTGAAGCTTCACCGGC<br>GCAGTCATTCTCATAATCGCCCACGGACTTACATCCTCATTACTATTCTGCCTAG<br>CAAACCTCAAACCTACGAACGCACTCACAGTCGCATCATAATCCTCTCTCAAGGACT<br>TCAAACCTACTCCCA                                                                                                    |
| ND5.2                                | CGGGTCCATCATCCACAACCTTAACAATGAACAAGATATTCGAAAAATAGGAGG<br>ACTACTCAAACCCATACCTCTCACTTCAACCTCCCTCACCATTGGCAGCCTAGCA<br>TTAGCAGGAATACCTTTCCCTCACAGGTTTCTACTCCAAAGACCACATCATCGAAA<br>CCGCAAACATATCATACACAAACGCCTGAGCCCTATCTATTACTCT                                                                     |
| ND5.4                                | GCAGTCTGCGCCCTTACACAAAATGACATCAAAAAAATCGTAGCCTTCTCCACTT<br>CAAGTCAACTAGGACTCATAATAGTTACAATCGGCATCAACCAACCACACCTAGC<br>ATTCCTGCACATCTGTACCCACGCCTTCTTCAAAGCCATACTATTTATGTGCTCC<br>GGGTCCATCATCCACAACCTTAACAATGAACAAGATATTCG                                                                          |
| ATP8                                 | CTTTACAGTGAAATGCCCAACTAAATACTACCGTATGGCCCACCATAATTACCC<br>CCATACTCCTTACACTATTCCTCATCACCCAACCTAAAATATTAACACAAACTAC<br>CACCTACCTCCCTACCAAAGCCATAAAAAATAAAAAATTATAACAAACCCTGAG<br>AACCAAAATGAACGAAAATCTGTTTCGCTTCATTCAATTGCCCCC                                                                        |
| SIRT6 (on-target)                    | GGAAGCGGCCTCAACAAGGGAAACTTTATTGTTCCCGTGGGGCAGTCGAGGAT<br>GTCGGTGAATTACGCGGGCGGGGCTGTGCGCGTACGCGGACAAGGGCAAGTGC<br>GGCCTCCCGGAGGTGAGCGCGTCTGAGGGTCCCGAGCATCGCGCCCCAGGGC<br>CGCGGGCTGGGAGCGGCCGGATGGCAGGGGGGCATTGTGGGAATATCAGGG<br>GGC                                                                |
| JAK2 (on-target)                     | GCTAGGATTACAGGTGTGAGACACTGCGCCCAGCCATTTGTAACCTTATTGTTT<br>TCTCTTACAGGCAAATGTTCTGAAAAAGACTCTGCATGGGAATGGCCTGCCTTA<br>CGATGACAGAAATGGAGGGAAACATCCACCTCTTCTATATATCAGAATGGTGATAT<br>TTCTGGAAATGCCAATTCTATGAAGCAAATAGATCCAGTTCTTCAGGTG                                                                   |
| pBM10 plasmid series for NCN library | CGTTTTAGACTGAGCACGTCAATACGCAAACCGCCTCTCCCCGCGCGTTGGCC<br>GATTCATTAATGCAGCTGGCACGACAGGTTTCCCGACTGGAGTTTGTAGTCTAG<br>TCTGT <b>CCGACTTCGCGTTTTTTTTIGTTTTATTT<b>AGCAAACG</b>ACGAACCCGCCAAA</b><br>CGCGCCCTGACGGGATTGTCTGCTCCCGGCATCCG<br>Blue = UMI; Bold = TALE binding sites; Underlined = NCN target |

|           |                                                                                                                                                                                                                                                                                                                                                                                                                                                          |
|-----------|----------------------------------------------------------------------------------------------------------------------------------------------------------------------------------------------------------------------------------------------------------------------------------------------------------------------------------------------------------------------------------------------------------------------------------------------------------|
| SIRT6-OT1 | TGGCCAAGCAGGGATCACGTCCCTCTGCCTTGGCCACTCCAGGCCACCTGCAG<br>AGGGGGCAGCCCTGTCAGTGATGGAGGGGGAGACAGCCTGTGTTATTCACGCC<br>GGAAGTCCATGGCATTCTCAGAGAGCTCTTCCCCGTACCTCCCCAGAACACTGA<br>GAATGGATGAATCAGTCCCGGCTCATCAGAGCCTTTCATGCTAAACCAGCCCAA<br>ATGACTGATTTAGAACTGCGTGGTCTTGTCTTTGAGTGGATTTCTGAGGCACA<br>CTCCAGAGCAGGCCAGGTCTTCATTATCTCCATGCACACCCTTTGATTAAGCAT<br>CTGTGACCACACAGCACTGTGTGCTGTACCCAAGGAGGCAACAG                                                    |
| SIRT6-OT2 | GGGGGAGTCGGACTTAGAAGGTTGCCTCTGCTGCTCTCCCACTAAGAACAATG<br>CAGCTGCCAGGAAACACACCCGAGCTATGAATAGGCTCAAGCACACAGGGCG<br>AAGCTGTCGCATTTCTGCCGTTTAGAAAGGATCTCTAGTGTGAAGTTGCTTGA<br>GGCTCTGATTTTGCAAACCAATTAATATAGATTTCTTTGGGGTGACGGTTGGG<br>AAGGGTGTGGGTGGAATGTATGTCTGTGCTGCAATGCAATTTAATCCTGAAAGT<br>TTCAGCAAACCTATTCACACACTCCATAAACATTTCTGAGCACCTGCTGTGTGCC<br>AAG                                                                                              |
| SIRT6-OT3 | TGCTAGGCCCCGATTTGTGGACACTGAGCTAGGCCAAAAGGATATATAAAGAGAT<br>GCAAGCTAGAGGAGGGGAAAGTTCTGGATGGGGACCTCATTGGCCTCCTCACC<br>TCTGTAGACCCACGTCTTGGGTTGACCCAGGGTAGAACCTATAAGGATTTGTT<br>CAATAAACGAATGCATAGAGACTGATCAACAACCTGACAAAGTGGTATTTTACAGA<br>TGCCGTGAAAGCAGCATAACAAGCCGGAGAGCCTACTGGAAGCAAGAGGGGAAA<br>ACCCAGCCGGGTATGGGGGCTGCGGGGAGGATGCCAGGTGGCGGAGACTGGA<br>TTCAGGATTTGATGCTTGAACCTGAACCTTCTTTAAGAGGTGAGTGGGCTGGGA<br>GTTTGTGATGCCAGAGGGTGAGGAAGGAAGTGGGG |
| SIRT6-OT4 | GACCCTTCCATTAGATCTGAGGGCGGGGTGGGAGGGGCAGAGGAGGGGAGGAC<br>AGAGAAGTGGGAGGAAGCAGGAGAGGGGGTGGAGGGGTAGGGGCACAGTGTC<br>ATGCCTCTCGGGCTTCCCCACAGGGTGAATGACTGTGTGCTGCGGGTGAATG<br>AGGTGGACGTGTGCGGAGGTGGTACACAGCCGGGCGGTGGAGGCGCTGAAGGA<br>GGCAGGCCCTGTGGTGCGATTGGTGGTGCAGGAGGCGACAGCCTCCACCCGAG<br>ACCATCATGGAGGTCAACCTGCTCAAAGGGCCCAAAGGTGCGGCCCTCCAGGT<br>TCCTGTGCTCCAGCCAGAGC                                                                                 |
| SIRT6-OT5 | GGATCCAAGGTGCCTTACCCTGCGGCCTGCTCTATGAGGGCCTGCGTCCGAC<br>ATCAGCTGTTGGTATCCTCACCTCGCTGAGCCGTTCCCTCCGAGTGTGCTCTGTG<br>GCTTGCACCAGGCCTAGCTGGGCCTTGTGTCTGGTCTCATCCAGCGTCTTCTGA<br>TTGTGGGGAATGAGGCAGAGGTCTCCCCACCTGGGCTGTCCGTGTGGCGAAAG<br>CCTTCCGGGGGGAGGGAGAGGAAGTGCCTCTACAAGGGCCTAGAGTCGTCCT<br>GTGGCACTGAGGGCTCTGGCAGCTGCACACAGGTTGATAATGTCACTGGTGGG<br>TGAGCTCTGTGGT                                                                                     |
| SIRT6-OT6 | GCTGGATTGATCTGAGGTCAGCTTACTTTTCCCTCAGGATGATGCGCTGCTT<br>CCTCTGATGAAGGATCAGGGATGCAGAATGGGACTGATGTATCTGTCCAATCAT<br>CCCACTCATTCTCCTCACTTTGCATGCTCTTCTCGGGGCCATCTACAGACAGGT<br>GAGGGGCCCCAGGCAGACAGCTCCTTGGGACACTGAGCTCCACATTGAAATGT<br>TACTCAAATGAATGCGCAGAGGAGCTGTGAGTGAGAAAGTAAGCCCTCCAGCGT<br>GAAGAGCCCCGAAAAGCCACCCTTGTCTGGCACCTGTCATGCAGCCCTCAC<br>AGCAGTACTCCCATGGGGTATGGGAGGACAGGGGCACTTCTGTTGGTCTTTCT<br>TCCTCATGTTTCGTCCAGTAGGGCCTG               |
| SIRT6-OT7 | CCCAGGACAAAGTTGCTTTGGGGCGTTACAGGTTGAATCACCCATAGCTATGT<br>TTTGTGGCTTGTACTGTGTTGTTTACATTATTTTATTAGTTGGCAATAGCTTTAA<br>ATCAAAATTTACATTAAGGTCCAGATTTGGGGCTCCTCTTAAAAAATAAATCAG<br>CACATCTACAACAGTAGGATTTTACGCCCAATGGCAAATCTGTTAAAGCTGTG                                                                                                                                                                                                                      |



|          |                                                                                                                                                                                                                                                                                                                                                                                                                                                                                                            |
|----------|------------------------------------------------------------------------------------------------------------------------------------------------------------------------------------------------------------------------------------------------------------------------------------------------------------------------------------------------------------------------------------------------------------------------------------------------------------------------------------------------------------|
|          | TTGTTAATTAATATAACAGTAATTTCTTTATTTCAGTCACAGAAACATCAATGTATCT<br>ATGCTGAAGCACCATAATTTTATAAGCACAGTTATTGGGGGAAAATGTTACCTTT<br>TTGTCCTAAAAAGACTCTCCACGCATGTAGCTAGGGAAAGCTAAGGTCAGTGGC<br>AGAGTTATATGCACACCTCCACCACCAACATCACCACCACCACCTCCTCCTTCAT<br>CTCTCATCCAGCTCTGCCTTAGGCCCTTTTTTTCTTTTCTTTTCTTTTCTTTT<br>TTTCCCAAGACAGGGTCTCACTC                                                                                                                                                                             |
| JAK2-OT5 | GGAACAGTGATCAGTTCTGTTACCTGACCATAATGGCTAAACAAAACAACCAAAT<br>TATAAATTAAGGGGTTTGAATATATAGAACATTCATTTTTTCAGCTACTAGCCAA<br>AAAATACTATCTCTACCTGCTATCCCATGTGTTGTGTTCTTTTTAGACTGTCTAAT<br>TTTGAGCTGAACTGTTTCTTAGACTGACAGACAAGTCATAAATCAAGTGATTGCT<br>ATAAATGCTTTTTATTTATATAGAGAGTGTCTCAGATTTTTACCTTTCTTTCATAAA<br>CTTGTCAATAATTTCTAATTCACCAATAGATGGTTGGTGTCCATTTTTCTTGAGTC<br>TAAGACACTTTTAAAAATTTACTTGACTTGCTTTTACGTACTTTCTTCAGAGCC                                                                               |
| JAK2-OT6 | TCCGGATTCTCCTGCTGAGGCAGGAGAATCGCTTGAAGCTGGGAGGCAGAGAT<br>TGCAGTGAGCTAAGATCAGGCCATTGCACTCCAGCCTGGGTGACAGAGCGAGA<br>CTCTGTCTCAAAAAACAAAACAAAACAAAAAAGAGAAAGTCAGTAGCATGT<br>AGATCAGGAGTGTCCAATCTTTTGGCTCCTCTGGAAGAAGAATTGTCTTGGGCC<br>ACACATAAAATACACCATCACCTAACGATAGCTGATGAGCTTAAAAAATCACA<br>GAAAAATATCATAATGTTTTAAGAATGTTTATGAATTTTTTACAAATTTCTGTTGGG<br>CCACATTCAAAGCTGTCCTGGG                                                                                                                            |
| JAK2-OT7 | CCGACTGCTCTGCCTTCTGAATCATATGTAACCAAATCAAGTCAAACAGGTTAGA<br>AGACAACCTCACACTTCAGTGTCTGTACTCTTATCTTCATGAGTGTGGGAATG<br>TACAATCCACTTTTCGCTCACTATATTAATTCATTCTGGTTCCTCATGTACTTAACC<br>TATTTTTATTTTTTCAGTTTGGATACAACCCAAATCCTCTCAAGCCTTTTAAATGC<br>AAAAAAAAAAAAATAAATTTAAAGTATATGTAGTTAAAAATACTCATGTCTTTACCCA<br>TTCCTTTGAGAATTTCTGTAGAGGCTTTCTCAAATGCAGAGAGTGGAGGCAGT<br>CATAACATATGATGCCTGCAGATTGGGGTATCTGTCAATTAATCAAGAGAAGAAA<br>TAAACATTTTATGTCATTGATTTATCCATTTAGTTGCTATCATCTTTATAGGTTAT<br>GCCCAATACATGGGC |
| JAK2-OT8 | GTCCATGAATGACAGAGCACATTCACACTCATTCAATTTACATATTTTCTATGCCTG<br>TTTTTTATGCTAAATCTGTAGAGTTTAGTAATGGCAAAGATACCGTATGGTCCA<br>CAAGGCCTAAAATAGCTACTATCTGTACCTTACAGAAAAAAAAAAGAGCTGACT<br>CTTTTTCTGACCTCTGGTCTAAGTCAAGTCTGTCCACAAGACACAAGGTACAAT<br>GCTTTTTCCACATGAGGTCAGGAAGAATCTCAAACACTACAGAGTCAGGCCTCAC<br>ATTATCAATAGGACCATCCTAGCCTTCTGCAAGCTTTCAGGCTTTAGTCAAAGCT<br>GGCACATTTTCAGTGAATCCTTAGTCCACTGGTGGTCTGCAAGAGCCAGAGC                                                                                      |
| JAK2-OT9 | GTAAGGGTGAAAATTCATTTGATGGAAATACTTGTGTATATTTAAAGACCCAATT<br>GCTCCTCTGGAGCTTGTACTTTCAAGAATGATTAATCTGTGTAATAAACTGGTTA<br>CTACAGTCATTACATATAATTTTGTGTGAATAGGCTTTTTTCAATTTTAAAGAGTTT<br>GTCTAGCTGAGATTAGTGGTGGATTTTCTCCACTTCTGAAATGTTCAATTTATACT<br>GGTTGCATTTTAAAGATCATGAAACAATTCCAGTTACATTGTA AAAAGGATATCTTA<br>CGAGTAATTTTATTGAACAAGTTAGAGGCATAAGCTTAAAGAGCATTTCATGAAA<br>CAACACATGCAGCATTCCAGGAACTTG                                                                                                        |



## Supplementary Table 9 | List of bacterial plasmids used in this work

| Name         | Class (res)                          | Origin  | ORF1              |                                          | ORF2              |                  |
|--------------|--------------------------------------|---------|-------------------|------------------------------------------|-------------------|------------------|
|              |                                      |         | Promoter          | [RBS] Genes                              | Promoter          | [RBS] Genes      |
| pJC175e-DddI | AP (carb) <sup>R</sup>               | SC101   | P <sub>psp</sub>  | [SD8] gIII                               | P <sub>ProD</sub> | [SD8] DddI-VSV-G |
| MP6          | MP (chlor) <sup>R</sup>              | cloDF13 | P <sub>BAD</sub>  | dnaQ926, dam, seqA, emrR, ugi, cda1      | P <sub>c</sub>    | araC             |
| AP1          | AP (carb) <sup>R</sup>               | SC101   | P <sub>T7</sub>   | [SD8] gIII                               |                   |                  |
| AP2          | AP (carb) <sup>R</sup>               | SC101   | P <sub>T7</sub>   | [sd8] gIII                               |                   |                  |
| CP1-TCC      | CP (spec) <sup>R</sup>               | ColE1   | P <sub>Pro1</sub> | [sd2] T7 RNAP-TCC linker-degron          |                   |                  |
| CP2-TCC      | CP (spec) <sup>R</sup>               | ColE1   | P <sub>Pro1</sub> | [sd4U] T7 RNAP-TCC linker-degron         |                   |                  |
| CP2-ACC      | CP (spec) <sup>R</sup>               | ColE1   | P <sub>Pro1</sub> | [sd4U] T7 RNAP-ACC linker-degron         |                   |                  |
| CP2-CCC      | CP (spec) <sup>R</sup>               | ColE1   | P <sub>Pro1</sub> | [sd4U] T7 RNAP-CCC linker-degron         |                   |                  |
| CP2-GCC      | CP (spec) <sup>R</sup>               | ColE1   | P <sub>Pro1</sub> | [sd4U] T7 RNAP-GCC linker-degron         |                   |                  |
| CP3-GCA      | CP (spec) <sup>R</sup>               | ColE1   | P <sub>Pro1</sub> | [sd5] T7 RNAP-GCA linker-degron          |                   |                  |
| CP3-GCG      | CP (spec) <sup>R</sup>               | ColE1   | P <sub>Pro1</sub> | [sd5] T7 RNAP-GCG linker-degron          |                   |                  |
| pBM10a       | NCN target (carb) <sup>R</sup>       | SC101   | N.A.              | ACA target                               |                   |                  |
| pBM10b       | NCN target (carb) <sup>R</sup>       | SC101   | N.A.              | ACT target                               |                   |                  |
| pBM10c       | NCN target (carb) <sup>R</sup>       | SC101   | N.A.              | ACC target                               |                   |                  |
| pBM10d       | NCN target (carb) <sup>R</sup>       | SC101   | N.A.              | ACG target                               |                   |                  |
| pBM10e       | NCN target (carb) <sup>R</sup>       | SC101   | N.A.              | TCA target                               |                   |                  |
| pBM10f       | NCN target (carb) <sup>R</sup>       | SC101   | N.A.              | TCT target                               |                   |                  |
| pBM10g       | NCN target (carb) <sup>R</sup>       | SC101   | N.A.              | TCC target                               |                   |                  |
| pBM10h       | NCN target (carb) <sup>R</sup>       | SC101   | N.A.              | TCG target                               |                   |                  |
| pBM10i       | NCN target (carb) <sup>R</sup>       | SC101   | N.A.              | CCA target                               |                   |                  |
| pBM10j       | NCN target (carb) <sup>R</sup>       | SC101   | N.A.              | CCT target                               |                   |                  |
| pBM10k       | NCN target (carb) <sup>R</sup>       | SC101   | N.A.              | CCC target                               |                   |                  |
| pBM10l       | NCN target (carb) <sup>R</sup>       | SC101   | N.A.              | CCG target                               |                   |                  |
| pBM10m       | NCN target (carb) <sup>R</sup>       | SC101   | N.A.              | GCA target                               |                   |                  |
| pBM10n       | NCN target (carb) <sup>R</sup>       | SC101   | N.A.              | GCT target                               |                   |                  |
| pBM10o       | NCN target (carb) <sup>R</sup>       | SC101   | N.A.              | GCC target                               |                   |                  |
| pBM10p       | NCN target (carb) <sup>R</sup>       | SC101   | N.A.              | GCG target                               |                   |                  |
| pBM22a       | Window profiling (carb) <sup>R</sup> | SC101   | N.A.              | (TC) <sub>12</sub> target, top strand    |                   |                  |
| pBM22b       | Window profiling (carb) <sup>R</sup> | SC101   | N.A.              | (TC) <sub>13</sub> target, top strand    |                   |                  |
| pBM22c       | Window profiling (carb) <sup>R</sup> | SC101   | N.A.              | (TC) <sub>14</sub> target, top strand    |                   |                  |
| pBM22d       | Window profiling (carb) <sup>R</sup> | SC101   | N.A.              | (TC) <sub>15</sub> target, top strand    |                   |                  |
| pBM22e       | Window profiling (carb) <sup>R</sup> | SC101   | N.A.              | (TC) <sub>16</sub> target, top strand    |                   |                  |
| pBM22f       | Window profiling (carb) <sup>R</sup> | SC101   | N.A.              | (TC) <sub>17</sub> target, top strand    |                   |                  |
| pBM22g       | Window profiling (carb) <sup>R</sup> | SC101   | N.A.              | (TC) <sub>18</sub> target, top strand    |                   |                  |
| pBM23a       | Window profiling (carb) <sup>R</sup> | SC101   | N.A.              | (TC) <sub>12</sub> target, bottom strand |                   |                  |
| pBM23b       | Window profiling (carb) <sup>R</sup> | SC101   | N.A.              | (TC) <sub>13</sub> target, bottom strand |                   |                  |
| pBM23c       | Window profiling (carb) <sup>R</sup> | SC101   | N.A.              | (TC) <sub>14</sub> target, bottom strand |                   |                  |
| pBM23d       | Window profiling (carb) <sup>R</sup> | SC101   | N.A.              | (TC) <sub>15</sub> target, bottom strand |                   |                  |
| pBM23e       | Window profiling (carb) <sup>R</sup> | SC101   | N.A.              | (TC) <sub>16</sub> target, bottom strand |                   |                  |
| pBM23f       | Window profiling (carb) <sup>R</sup> | SC101   | N.A.              | (TC) <sub>17</sub> target, bottom strand |                   |                  |
| pBM23g       | Window profiling (carb) <sup>R</sup> | SC101   | N.A.              | (TC) <sub>18</sub> target, bottom strand |                   |                  |

|                 |                                      |        |                   |                                                                                  |                         |                                              |
|-----------------|--------------------------------------|--------|-------------------|----------------------------------------------------------------------------------|-------------------------|----------------------------------------------|
| pBM13h          | NCN assay (spec) <sup>R</sup>        | ColE1  | P <sub>BAD</sub>  | [sd2] UGI-TALE3-DddA-G1397-N<br>wildtype                                         | P <sub>c</sub>          | araC                                         |
| pBM13h-<br>sd4U | window profiling (spec) <sup>R</sup> | ColE1  | P <sub>BAD</sub>  | [sd4U] UGI-TALE3-DddA-G1397-N<br>wildtype                                        |                         |                                              |
| pBM13           | NCN assay (spec) <sup>R</sup>        | ColE1  | P <sub>BAD</sub>  | [sd2] UGI-TALE3-DddA-G1397-N<br>(Q1310R + S1330I + T1380I)                       | P <sub>c</sub>          | araC                                         |
| pBM13-<br>sd4U  | window profiling (spec) <sup>R</sup> | ColE1  | P <sub>BAD</sub>  | [sd4U] UGI-TALE3-DddA-G1397-N<br>(Q1310R + S1330I + T1380I)                      | P <sub>c</sub>          | araC                                         |
| pBM13a          | NCN assay (spec) <sup>R</sup>        | ColE1  | P <sub>BAD</sub>  | [sd2] UGI-TALE3-DddA-G1397-N<br>(T1314A + G1344R + V1364M +<br>E1370K + T1380I)  | P <sub>c</sub>          | araC                                         |
| pBM13b          | NCN assay (spec) <sup>R</sup>        | ColE1  | P <sub>BAD</sub>  | [sd2] UGI-TALE3-DddA-G1397-N<br>(N1342S + G1344R + V1364M +<br>E1370K + T1380I)  | P <sub>c</sub>          | araC                                         |
| pBM13c          | NCN assay (spec) <sup>R</sup>        | ColE1  | P <sub>BAD</sub>  | [sd2] UGI-TALE3-DddA-G1397-N<br>(A1341T + N1342S + E1370K +<br>T1380I)           | P <sub>c</sub>          | araC                                         |
| pBM13e          | NCN assay (spec) <sup>R</sup>        | ColE1  | P <sub>BAD</sub>  | [sd2] UGI-TALE3-DddA-G1397-N<br>(T1314A + G1344S + E1370K +<br>T1380I)           | P <sub>c</sub>          | araC                                         |
| pBM13f          | NCN assay (spec) <sup>R</sup>        | ColE1  | P <sub>BAD</sub>  | [sd2] UGI-TALE3-DddA-G1397-N<br>(T1314A + G1344S + E1370K +<br>T1380I + E1396K)  | P <sub>c</sub>          | araC                                         |
| pBM13g          | NCN assay (spec) <sup>R</sup>        | ColE1  | P <sub>BAD</sub>  | [sd2] UGI-TALE3-DddA-G1397-N<br>(S1330I + A1341V + N1342S +<br>E1370K + T1380I)  | P <sub>c</sub>          | araC                                         |
| pBM13g-<br>sd4U | window profiling (spec) <sup>R</sup> | ColE1  | P <sub>BAD</sub>  | [sd4U] UGI-TALE3-DddA-G1397-N<br>(S1330I + A1341V + N1342S +<br>E1370K + T1380I) | P <sub>c</sub>          | araC                                         |
| pBM14d          | NCN assay (kan) <sup>R</sup>         | p15A   | P <sub>BAD</sub>  | [sd2] UGI-TALE4-DddA-G1397-C<br>wildtype                                         | P <sub>c</sub>          | araC                                         |
| pBM14           | NCN assay (kan) <sup>R</sup>         | p15A   | P <sub>BAD</sub>  | [sd2] UGI-TALE4-DddA-G1397-C<br>(T1413I)                                         | P <sub>c</sub>          | araC                                         |
| pBM14c          | NCN assay (kan) <sup>R</sup>         | p15A   | P <sub>BAD</sub>  | [sd2] UGI-TALE4-DddA-G1397-C<br>(A1398T + T1413I)                                | P <sub>c</sub>          | araC                                         |
| pBM19           | window profiling (spec) <sup>R</sup> | p15A   | P <sub>BAD</sub>  | [sd4U] UGI-TALE4-DddA-G1397-C<br>(T1413I)                                        | P <sub>c</sub>          | araC                                         |
| SPBM13          | SP (none)                            | M13 f1 | P <sub>gIII</sub> | [sd8] UGI-TALE3-DddA-G1397-N<br>wildtype                                         | P <sub>BBa_J23101</sub> | [sd8] UGI-TALE3-<br>DddA-G1397-C<br>wildtype |
| SPBM13a         | SP (none)                            | M13 f1 | P <sub>gIII</sub> | [sd8] UGI-TALE3-DddA-G1397-N<br>(T1380I)                                         | P <sub>BBa_J23101</sub> | [sd8] UGI-TALE3-<br>DddA-G1397-C<br>wildtype |
| SPBM14          | SP (none)                            | M13 f1 | P <sub>gIII</sub> | [sd8] UGI-TALE3-DddA-G1397-N<br>(E1347A)                                         | P <sub>BBa_J23101</sub> | [sd8] UGI-TALE3-<br>DddA-G1397-C<br>wildtype |
| SPBM29          | SP (none)                            | M13 f1 | P <sub>gIII</sub> | [sd8] UGI-TALE3-DddA-G1397-N<br>(S1330I + A1341V + N1342S +<br>E1370K + T1380I)  | P <sub>BBa_J23101</sub> | [sd8] UGI-TALE3-<br>DddA-G1397-C<br>(T1413I) |

**Supplementary Table 10** | List of DNA sequences recognized by TALE proteins

| <b>DdCBE</b>          | <b>Left-TALE target sequence</b> | <b>Right-TALE target sequence</b> |
|-----------------------|----------------------------------|-----------------------------------|
| T7                    | 5'-T CCGACTTCGCGTT               | 5'-T CGTCGTTTGCT                  |
| ND1.1                 | 5'-T CTAGCCTAGCCGTTT-3'          | 5'-T GAGTTTGATGCTCACCCCT-3'       |
| ND1.2                 | 5'-T CCTAATGCTT-3'               | 5'-T ATATAGCCTAGA-3'              |
| ND2                   | 5'-T CTTAGCATACTCCTCAAT-3'       | 5'-T AGAACTGCTATTATT-3'           |
| ND4                   | 5'-T GCTAGTAACCACGTTCT-3'        | 5'-T CCTGTAAGTAGGAGAGT-3'         |
| ND4.2                 | 5'-T GAAGCTTCACC-3'              | 5'-T GGGCGATTATGA-3'              |
| ND4.3                 | 5'-T CTTCAATCAGCC-3'             | 5'-T GGCTGTTACT-3'                |
| ND5.2<br>(mismatched) | 5'-T CAAAACCATACCTCT-3'          | 5'-T GCTAGGCTGCCAATGT-3'          |
| ND5.2 (no mismatch)   | 5'-T CAAAACCATACCTCT-3'          | 5'-T GCTAGGCTGCCAATGG-3'          |
| ND5.4                 | 5'-T CATAATAGTTACAA-3'           | 5'-T GCTAGGTGT-3'                 |
| ATP8<br>(mismatched)  | 5'-T ATTAACACAAACTAT-3'          | 5'-T ATGGGCTTTGGT-3'              |
| ATP8 (no mismatch)    | 5'-T ATTAACACAAACTAC-3'          | 5'-T ATGGGCTTTGGT-3'              |
| ND5.4                 | 5'-T CATAATAGTTACAA-3'           | 5'-T GCTAGGTGT-3'                 |
| SIRT6                 | 5'-T TACGCGGCGGGGCTGTC-3'        | 5'-T CCGGGAGGCCGCACTTG-3'         |
| JAK2                  | 5'-T CTGAAAAGACTCTGCA-3'         | 5'-T CCATTTCTGTCATCGTA-3'         |

**Supplementary Table 11** | Primers used for mammalian and bacteria cell genomic DNA amplification at sites targeted by DdCBEs

| Site                                                  | HTS forward primer                                                      | HTS reverse primer                                                |
|-------------------------------------------------------|-------------------------------------------------------------------------|-------------------------------------------------------------------|
| ND1.1                                                 | ACACTCTTTCCCTACACGACGCTC<br>TTCCGATCTNNNNCTCACCATCG<br>CTCTTCTACTATG    | TGGAGTTCAGACGTGTGCTCTTCCGA<br>TCTGGCTAGGGTGACTTCATATGAG           |
| ND1.2                                                 | ACACTCTTTCCCTACACGACGCTC<br>TTCCGATCTNNNNGCCAACCTCC<br>TACTCCTCAT       | TGGAGTTCAGACGTGTGCTCTTCCGA<br>TCTGGGCGGTGATGTAGAGGG               |
| ND2                                                   | ACACTCTTTCCCTACACGACGCTC<br>TTCCGATCTNNNNCGTAAGCCTTC<br>TCCTCACT        | TGGAGTTCAGACGTGTGCTCTTCCGA<br>TCTGTTGAGTAGTAGGAATGCGGTAG          |
| ND4                                                   | ACACTCTTTCCCTACACGACGCTC<br>TTCCGATCTNNNNGACTTCAAAC<br>CTACTCCCACTAATAG | TGGAGTTCAGACGTGTGCTCTTCCGA<br>TCTGTTGTGGTAAATATGTAGAGGGA<br>G     |
| ND4.2                                                 | ACACTCTTTCCCTACACGACGCTC                                                | TGGAGTTCAGACGTGTGCTCTTCCGA                                        |
| ND4.3                                                 | TTCCGATCTNNNNCTGCCTACGA<br>CAAACAGACC                                   | TCTTGGGAGTAGAGTTTGAAGTCC                                          |
| ND5.2                                                 | ACACTCTTTCCCTACACGACGCTC<br>TTCCGATCTNNNNCGGGTCCATC<br>ATCCACAAC        | TGGAGTTCAGACGTGTGCTCTTCCGA<br>TCTAGAGTAATAGATAGGGCTCAGGC          |
| ND5.4                                                 | ACACTCTTTCCCTACACGACGCTC<br>TTCCGATCTNNNNGCAGTCTGCG<br>CCCTTAC          | TGGAGTTCAGACGTGTGCTCTTCCGA<br>TCTCGAATATCTTGTTTCATTGTTAAGG<br>TTG |
| ATP8                                                  | ACACTCTTTCCCTACACGACGCTC<br>TTCCGATCTNNNNCTTTACAGTGA<br>AATGCCCAAC      | TGGAGTTCAGACGTGTGCTCTTCCGA<br>TCTGGGGGCAATGAATGAAGCG              |
| SIRT6 (on-target)                                     | ACACTCTTTCCCTACACGACGCTC<br>TTCCGATCTNNNNGGAAGCGGCC<br>TCAACAAG         | TGGAGTTCAGACGTGTGCTCTTCCGA<br>TCTGCCCCCTGATATTCCCAC               |
| JAK2 (on-target)                                      | ACACTCTTTCCCTACACGACGCTC<br>TTCCGATCTNNNNGCTAGGATTAC<br>AGGTGTGAGAC     | TGGAGTTCAGACGTGTGCTCTTCCGA<br>TCTCACCTGAAGAACTGGATCTATTTG         |
| T7-DdCBE<br>(for targeting<br>NCN library<br>plasmid) | ACACTCTTTCCCTACACGACGCTC<br>TTCCGATCTNNNNCGTTTTAGACT<br>GAGCACGTCAATAC  | TGGAGTTCAGACGTGTGCTCTTCCGA<br>TCTCGGATGCCGGGAGC                   |
| SIRT6-OT1                                             | ACACTCTTTCCCTACACGACGCTC<br>TTCCGATCTNNNNTGGCCAAGCA<br>GGGATC           | TGGAGTTCAGACGTGTGCTCTTCCGA<br>TCTCTGTTGCCTCCTTGGGTAC              |
| SIRT6-OT2                                             | ACACTCTTTCCCTACACGACGCTC<br>TTCCGATCTNNNNGGGGGAGTCG<br>GACTTAGAAGG      | TGGAGTTCAGACGTGTGCTCTTCCGA<br>TCTCTTGGCACACAGCAGGTGCTC            |
| SIRT6-OT3                                             | ACACTCTTTCCCTACACGACGCTC<br>TTCCGATCTNNNNTGCTAGGCC<br>CGATTTGTGG        | TGGAGTTCAGACGTGTGCTCTTCCGA<br>TCTCCCCACTTCCTTCCTCACCT             |
| SIRT6-OT4                                             | ACACTCTTTCCCTACACGACGCTC<br>TTCCGATCTNNNNGACCCTTCCAT<br>TAGATCTGAGGGC   | TGGAGTTCAGACGTGTGCTCTTCCGA<br>TCTGCTCTGGCTGGAGCACAGGAA            |

|            |                                                                           |                                                                     |
|------------|---------------------------------------------------------------------------|---------------------------------------------------------------------|
| SIRT6-OT5  | ACACTCTTTCCCTACACGACGCTC<br>TTCCGATCTNNNNGGATCCAAGG<br>TGCCTTCACCC        | TGGAGTTCAGACGTGTGCTCTTCCGA<br>TCTACCACAGAGCCTCACCCACCA              |
| SIRT6-OT6  | ACACTCTTTCCCTACACGACGCTC<br>TTCCGATCTNNNNGCTGGATTCTG<br>ATCTGAGGTCAGCT    | TGGAGTTCAGACGTGTGCTCTTCCGA<br>TCTCAGGCCCTACTGGGACGAACA              |
| SIRT6-OT7  | ACACTCTTTCCCTACACGACGCTC<br>TTCCGATCTNNNCCAGGACAA<br>AGTTGCTTTGGGGC       | TGGAGTTCAGACGTGTGCTCTTCCGA<br>TCTCTCTTGCACAAGGTTGCCACCTC            |
| SIRT6-OT8  | ACACTCTTTCCCTACACGACGCTC<br>TTCCGATCTNNNNGCCTCGCCAA<br>GAAACGCCCAT        | TGGAGTTCAGACGTGTGCTCTTCCGA<br>TCTATTCCGGGTAGGCGAGGAGGT              |
| SIRT6-OT9  | ACACTCTTTCCCTACACGACGCTC<br>TTCCGATCTNNNCCAGCACACC<br>CTGATAAGC           | TGGAGTTCAGACGTGTGCTCTTCCGA<br>TCTAGGGCCCCAGTGAGTG                   |
| SIRT6-OT10 | ACACTCTTTCCCTACACGACGCTC<br>TTCCGATCTNNNCCAGGGCAAC<br>AGGTTTAAG           | TGGAGTTCAGACGTGTGCTCTTCCGA<br>TCTGCCACATCAGCTCTGC                   |
| JAK2-OT1   | ACACTCTTTCCCTACACGACGCTC<br>TTCCGATCTNNNNGTGTGGTCAG<br>GACAAACTGTTCCC     | TGGAGTTCAGACGTGTGCTCTTCCGA<br>TCTCTCCAGCCTGGGCGACTGAAT              |
| JAK2-OT2   | ACACTCTTTCCCTACACGACGCTC<br>TTCCGATCTNNNNGGGGCTGGGA<br>GAAGAGAGGAA        | TGGAGTTCAGACGTGTGCTCTTCCGA<br>TCTCCACTGATAACCTATGCCAGGA             |
| JAK2-OT3   | ACACTCTTTCCCTACACGACGCTC<br>TTCCGATCTNNNNGTCCACTCTGT<br>GTTACCCAGATC      | TGGAGTTCAGACGTGTGCTCTTCCGA<br>TCTCTATGGAGACTCCTTCAGGTCTTT<br>TTTCCC |
| JAK2-OT4   | ACACTCTTTCCCTACACGACGCTC<br>TTCCGATCTNNNNGCCGTTTAG<br>GTATGGGAACCAC       | TGGAGTTCAGACGTGTGCTCTTCCGA<br>TCTGAGTGAGACCCTGTCTTGGGGA             |
| JAK2-OT5   | ACACTCTTTCCCTACACGACGCTC<br>TTCCGATCTNNNNGGAACAGTGA<br>TCAGTTCTGTTACCTGAC | TGGAGTTCAGACGTGTGCTCTTCCGA<br>TCTGGCTCTGAAGAAAGTACGTAAAA<br>GACCAAG |
| JAK2-OT6   | ACACTCTTTCCCTACACGACGCTC<br>TTCCGATCTNNNNTCCGGATTCTC<br>CTGCTGAGGC        | TGGAGTTCAGACGTGTGCTCTTCCGA<br>TCTCCCAGGACAGCTTTGAATGTGGC            |
| JAK2-OT7   | ACACTCTTTCCCTACACGACGCTC<br>TTCCGATCTNNNCCGACTGCTC<br>TGCCTTCTGA          | TGGAGTTCAGACGTGTGCTCTTCCGA<br>TCTGCCATGTATTGGGGCATAACC              |
| JAK2-OT8   | ACACTCTTTCCCTACACGACGCTC<br>TTCCGATCTNNNNGTCCATGAATG<br>ACAGAGCAC         | TGGAGTTCAGACGTGTGCTCTTCCGA<br>TCTGCTCTGGCTCTTGCAGAC                 |
| JAK2-OT9   | ACACTCTTTCCCTACACGACGCTC<br>TTCCGATCTNNNNGTAAGGGTGA<br>AAATTCATTTGATGG    | TGGAGTTCAGACGTGTGCTCTTCCGA<br>TCTCAAGTTCCTGGAATGCTGCATG             |

**Supplementary Table 12** | Sequences of unique molecular identifiers associated with each target plasmid for NCN context profiling and editing window profiling . For sequence context profiling, each target plasmid contains a target cytosine flanked by two nucleotides of either A, T, C or G.

| Plasmid | UMI             | Sequence context | No. of TC repeats (top or bottom) |
|---------|-----------------|------------------|-----------------------------------|
| pBM10a  | TTTGTAGTCTAGTCT | ACA              |                                   |
| pBM10b  | CATTATGATCGTACG | ACT              |                                   |
| pBM10c  | CTATTCAGGGATTGA | ACC              |                                   |
| pBM10d  | CTGATACCGGAAGAC | ACG              |                                   |
| pBM10e  | ATCTCAGTTGAAGTG | TCA              |                                   |
| pBM10f  | GTGTATACGACAGAG | TCT              |                                   |
| pBM10g  | ACCGTGACCTACCA  | TCC              |                                   |
| pBM10h  | AACCTCCTTAGTCTA | TCG              |                                   |
| pBM10i  | AGTTCAGACCAATTG | CCA              |                                   |
| pBM10j  | GTAGTTTGTCCAGAA | CCT              |                                   |
| pBM10k  | CTCAGATTTTATCAC | CCC              |                                   |
| pBM10L  | CAGAGGACGCACGCT | CCG              |                                   |
| pBM10m  | CTACCTTTATGATCC | GCA              |                                   |
| pBM10n  | TCCTTGGTCCTCGAG | GCT              |                                   |
| pBM10o  | AAGAGGAGACGTCAG | GCC              |                                   |
| pBM10p  | TCCAGATATCTTTAA | GCG              |                                   |
| pBM22a  | TTTGTAGTCTAGTCT |                  | 12, top                           |
| pBM22b  | CATTATGATCGTACG |                  | 13, top                           |
| pBM22c  | CTATTCAGGGATTGA |                  | 14, top                           |
| pBM22d  | CTGATACCGGAAGAC |                  | 15, top                           |
| pBM22e  | ATCTCAGTTGAAGTG |                  | 16, top                           |
| pBM22f  | GTGTATACGACAGAG |                  | 17, top                           |
| pBM22g  | ACCGTGACCTACCA  |                  | 18, top                           |
| pBM23a  | AACCTCCTTAGTCTA |                  | 12, bottom                        |
| pBM23b  | AGTTCAGACCAATTG |                  | 13, bottom                        |
| pBM23c  | GTAGTTTGTCCAGAA |                  | 14, bottom                        |
| pBM23d  | CTCAGATTTTATCAC |                  | 15, bottom                        |
| pBM23e  | CAGAGGACGCACGCT |                  | 16, bottom                        |
| pBM23f  | CTACCTTTATGATCC |                  | 17, bottom                        |
| pBM23g  | TCCTTGGTCCTCGAG |                  | 18, bottom                        |

## Supplementary Sequences 1 | TALE sequences used in DdCBEs

All right-side halves of DdCBEs have the general architecture of (from N- to C-terminus): COX8A MTS–3xFLAG–mitoTALE–2aa linker–DddA<sub>tox</sub> half–4aa linker–1x-UGI– ATP5B 3'UTR

All left-side halves of DdCBEs have the general architecture of (from N- to C-terminus): SOD2 MTS–3xHA–mitoTALE–2aa linker–DddA<sub>tox</sub> half–4aa linker–1x-UGI– SOD2 3'UTR

mitoTALE domains are annotated as: bold for N-terminal domain, underlined for RVD and bolded italics for C-terminal domain.

ND1-DdCBE Right mitoTALE repeat

**DIADLRTL****GY****SQQQ****QEKIKPKV****RSTVAQHHEALVGHGFT****HAHIVAL****SQHPAALGTVA**  
**VKYQDMIAALPEATHEAIVGVGKQWSGARALEALLTVAGELRGPPLQLDTGQLLKIA**  
**KRGGVTAVEAVHAWRNAL****TGAPLNLTPEQVVAIASN****NGGKQALETVQALLPVLCQAH**  
**GLTPQQVVAIASN****IGGKQALETVQRLLPVLCQAHGLTPQQVVAIASN****NGGKQALETVQ**  
**RLLPVLCQAHGLTPEQVVAIASN****GGGKQALETVQALLPVLCQAHGLTPEQVVAIASN****G**  
**GGKQALETVQALLPVLCQAHGLTPEQVVAIASN****GGGKQALETVQALLPVLCQAHGLTP**  
**EQVVAIASN****NGGKQALETVQRLLPVLCQAHGLTPEQVVAIASN****IGGKQALETVQALLPV**  
**LCQAHGLTPEQVVAIASN****GGGKQALETVQRLLPVLCQAHGLTPEQVVAIASN****NGGKQA**  
**LETVQALLPVLCQAHGLTPEQVVAIASH****DGGKQALETVQALLPVLCQAHGLTPEQVVAI**  
**ASN****GGGKQALETVQALLPVLCQAHGLTPEQVVAIASH****DGGKQALETVQRLLPVLCQA**  
**HGLTPQQVVAIASN****IGGKQALETVQRLLPVLCQAHGLTPEQVVAIASH****DGGKQALETV**  
**QALLPVLCQAHGLTPQQVVAIASH****DGGKQALETVQRLLPVLCQAHGLTPQQVVAIASH**  
**DGGKQALETVQRLLPVLCQAHGLTPQQVVAIASN****GGGRP****PALE** ***SIVAQLSRPDPALAAL***  
***TNDHLVALACLGGRPALDAVKKGLG***

ND1-DdCBE Left mitoTALE repeat

**DIADLRTL****GY****SQQQ****QEKIKPKV****RSTVAQHHEALVGHGFT****HAHIVAL****SQHPAALGTVA**  
**VKYQDMIAALPEATHEAIVGVGKQWSGARALEALLTVAGELRGPPLQLDTGQLLKIA**  
**KRGGVTAVEAVHAWRNAL****TGAPLNLTPEQVVAIASH****DGGKQALETVQALLPVLCQAH**  
**GLTPQQVVAIASN****GGGKQALETVQRLLPVLCQAHGLTPQQVVAIASN****IGGKQALETVQ**  
**RLLPVLCQAHGLTPEQVVAIASN****GGGKQALETVQALLPVLCQAHGLTPEQVVAIASH****D**  
**GGKQALETVQALLPVLCQAHGLTPEQVVAIASH****DGGKQALETVQALLPVLCQAHGLTP**  
**EQVVAIASN****GGGKQALETVQRLLPVLCQAHGLTPEQVVAIASN****IGGKQALETVQALLPV**  
**LCQAHGLTPEQVVAIASN****GGGKQALETVQRLLPVLCQAHGLTPEQVVAIASH****DGGKQA**  
**LETVQALLPVLCQAHGLTPEQVVAIASH****DGGKQALETVQALLPVLCQAHGLTPEQVVAI**  
**ASN****GGGKQALETVQALLPVLCQAHGLTPEQVVAIASN****GGGKQALETVQRLLPVLCQA**  
**HGLTPQQVVAIASN****GGGKQALETVQRLLPVLCQAHGLTPQQVVAIASN****GGGRP****PALE** ***SI***  
***VAQLSRPDPALAALTNDHLVALACLGGRPALDAVKKGLG***

ND1.2-DdCBE Left mitoTALE repeat

**DIADLRTL****GY****SQQQ****QEKIKPKV****RSTVAQHHEALVGHGFT****HAHIVAL****SQHPAALGTVA**  
**VKYQDMIAALPEATHEAIVGVGKQWSGARALEALLTVAGELRGPPLQLDTGQLLKIA**

**KRGGVTAVEAVHAWRNALTGAPLNLTPEQVVAIASNIGGKQALETVQALLPVLCQAH  
GLTPQQVVAIASNNGGKQALETVQRLLPVLCQAHGLTPQQVVAIASNIGGKQALETVQ  
RLLPVLCQAHGLTPEQVVAIASNNGGKQALETVQALLPVLCQAHGLTPEQVVAIASNIG  
GKQALETVQALLPVLCQAHGLTPEQVVAIASNNGGKQALETVQALLPVLCQAHGLTPE  
QVVAIASHDGGKQALETVQRLLPVLCQAHGLTPQQVVAIASHDGGKQALETVQALLPV  
LCQAHGLTPEQVVAIASNNGGKQALETVQRLLPVLCQAHGLTPEQVVAIASNIGGKQA  
LETVQRLLPVLCQAHGLTPEQVVAIASNNGGKQALETVQALLPVLCQAHGLTPQQVVAI  
ASNIGGRPALE **SIVAQLSRPDPALAALTNDHLVALACLGGRPALDAVKKGLG****

ND1.2-DdCBE Left mitoTALE repeat

**DIADLRTLGYSSQQQEKIKPKVRSSTVAQHHEALVGHGFTHAHIVALSQHPAALGTVA  
VKYQDMIAALPEATHEAIVGVGKQWSGARALEALLTVAGELRGPPLQLDTGQLLKIA  
KRGGVTAVEAVHAWRNALTGAPLNLTPEQVVAIASHDGGKQALETVQALLPVLCQAH  
GLTPQQVVAIASHDGGKQALETVQRLLPVLCQAHGLTPQQVVAIASNNGGKQALETV  
QRLLPVLCQAHGLTPEQVVAIASNIGGKQALETVQALLPVLCQAHGLTPEQVVAIASNI  
GGKQALETVQALLPVLCQAHGLTPEQVVAIASNNGGKQALETVQALLPVLCQAHGLTP  
EQVVAIASNNGGKQALETVQRLLPVLCQAHGLTPQQVVAIASHDGGKQALETVQALLP  
VLCQAHGLTPEQVVAIASNNGGKQALETVQRLLPVLCQAHGLTPQQVVAIASNNGGGR  
PALE **SIVAQLSRPDPALAALTNDHLVALACLGGRPALDAVKKGLG****

ND2-DdCBE Right mitoTALE repeat

**DIADLRTLGYSSQQQEKIKPKVRSSTVAQHHEALVGHGFTHAHIVALSQHPAALGTVA  
VKYQDMIAALPEATHEAIVGVGKQWSGARALEALLTVAGELRGPPLQLDTGQLLKIA  
KRGGVTAVEAVHAWRNALTGAPLNLTPEQVVAIASNIGGKQALETVQALLPVLCQAH  
GLTPQQVVAIASNNGGKQALETVQRLLPVLCQAHGLTPQQVVAIASNIGGKQALETVQ  
RLLPVLCQAHGLTPEQVVAIASNIGGKQALETVQALLPVLCQAHGLTPEQVVAIASHDG  
GKQALETVQALLPVLCQAHGLTPEQVVAIASNNGGKQALETVQALLPVLCQAHGLTPE  
QVVAIASNNGGKQALETVQRLLPVLCQAHGLTPEQVVAIASHDGGKQALETVQALLPV  
LCQAHGLTPEQVVAIASNNGGKQALETVQRLLPVLCQAHGLTPEQVVAIASNIGGKQA  
LETVQALLPVLCQAHGLTPEQVVAIASNNGGKQALETVQALLPVLCQAHGLTPEQVVAI  
ASNNGGKQALETVQALLPVLCQAHGLTPEQVVAIASNIGGKQALETVQRLLPVLCQAH  
GLTPQQVVAIASNNGGKQALETVQRLLPVLCQAHGLTPQQVVAIASNNGGGRPALE **SIV  
AQLSRPDPALAALTNDHLVALACLGGRPALDAVKKGLG****

ND2-DdCBE Left mitoTALE repeat

**DIADLRTLGYSSQQQEKIKPKVRSSTVAQHHEALVGHGFTHAHIVALSQHPAALGTVA  
VKYQDMIAALPEATHEAIVGVGKQWSGARALEALLTVAGELRGPPLQLDTGQLLKIA  
KRGGVTAVEAVHAWRNALTGAPLNLTPEQVVAIASHDGGKQALETVQALLPVLCQAH  
GLTPQQVVAIASNNGGKQALETVQRLLPVLCQAHGLTPQQVVAIASNNGGKQALETV  
QRLLPVLCQAHGLTPEQVVAIASNIGGKQALETVQALLPVLCQAHGLTPEQVVAIASNN  
GGKQALETVQALLPVLCQAHGLTPEQVVAIASHDGGKQALETVQALLPVLCQAHGLTP  
EQVVAIASNIGGKQALETVQRLLPVLCQAHGLTPEQVVAIASNNGGKQALETVQALLPV  
LCQAHGLTPEQVVAIASNIGGKQALETVQRLLPVLCQAHGLTPEQVVAIASHDGGKQA  
LETVQALLPVLCQAHGLTPEQVVAIASNNGGKQALETVQALLPVLCQAHGLTPEQVVAI  
ASHDGGKQALETVQALLPVLCQAHGLTPEQVVAIASHDGGKQALETVQRLLPVLCQAH  
GLTPQQVVAIASNNGGKQALETVQRLLPVLCQAHGLTPEQVVAIASHDGGKQALETVQ**



ALLPVLCQAHGLTPEQVVAIASNIGGKQALETVQALLPVLCQAHGLTPEQVVAIASNIGG  
KQALETVQALLPVLCQAHGLTPQQVVAIASNGGGRPALE **SIVAQLSRPDPALAAL TND**  
**HLVALACLGGRPALDAVKKGLG**

ND4-DdCBE Right mitoTALE repeat

**DIADLRTL**GY**SQQQ**QEKIKPKV**RSTVAQHHEALVGHGFT**HAHIVAL**SQHPAALGTVA**  
**VKYQDMIAALPEATHEAIVGVGKQWSGARALEALLTVAGELRGPPLQLDTGQLLKIA**  
**KRGGVTAVEAVHAWRNALTGAPLNLT**PEQVVAIASHDGGKQALETVQALLPVLCQAH  
GLTPQQVVAIASHDGGKQALETVQRLLPVLCQAHGLTPQQVVAIASNGGGKQALETV  
QRLLPVLCQAHGLTPEQVVAIASNGGGKQALETVQALLPVLCQAHGLTPEQVVAIASN  
GGGKQALETVQALLPVLCQAHGLTPEQVVAIASNIGGKQALETVQALLPVLCQAHGLT  
PEQVVAIASNIGGKQALETVQRLLPVLCQAHGLTPEQVVAIASNGGGKQALETVQALL  
VLCQAHGLTPEQVVAIASNGGGKQALETVQRLLPVLCQAHGLTPEQVVAIASNIGGKQ  
ALETVQRLLPVLCQAHGLTPEQVVAIASNGGGKQALETVQALLPVLCQAHGLTPEQV  
AIASNGGGKQALETVQALLPVLCQAHGLTPEQVVAIASNIGGKQALETVQALLPVLCQA  
HGLTPEQVVAIASNGGGKQALETVQRLLPVLCQAHGLTPQQVVAIASNIGGKQALETV  
QRLLPVLCQAHGLTPQQVVAIASNGGGKQALETVQRLLPVLCQAHGLTPQQVVAIASN  
GGGRPALE **SIVAQLSRPDPALAAL TNDHLVALACLGGRPALDAVKKGLG**

ND4-DdCBE Left mitoTALE repeat

**DIADLRTL**GY**SQQQ**QEKIKPKV**RSTVAQHHEALVGHGFT**HAHIVAL**SQHPAALGTVA**  
**VKYQDMIAALPEATHEAIVGVGKQWSGARALEALLTVAGELRGPPLQLDTGQLLKIA**  
**KRGGVTAVEAVHAWRNALTGAPLNLT**PEQVVAIASNGGGKQALETVQALLPVLCQAH  
GLTPQQVVAIASHDGGKQALETVQRLLPVLCQAHGLTPQQVVAIASNGGGKQALETV  
QRLLPVLCQAHGLTPEQVVAIASNIGGKQALETVQALLPVLCQAHGLTPEQVVAIASN  
GGKQALETVQALLPVLCQAHGLTPEQVVAIASNGGGKQALETVQALLPVLCQAHGLTP  
EQVVAIASNIGGKQALETVQRLLPVLCQAHGLTPEQVVAIASNIGGKQALETVQALLPV  
CQAHGLTPEQVVAIASHDGGKQALETVQRLLPVLCQAHGLTPEQVVAIASHDGGKQAL  
ETVQALLPVLCQAHGLTPEQVVAIASNIGGKQALETVQALLPVLCQAHGLTPEQVVAIA  
SHDGGKQALETVQALLPVLCQAHGLTPEQVVAIASNGGGKQALETVQRLLPVLCQAH  
GLTPQQVVAIASNGGGKQALETVQRLLPVLCQAHGLTPEQVVAIASNGGGKQALETVQ  
ALLPVLCQAHGLTPEQVVAIASHDGGKQALETVQALLPVLCQAHGLTPQQVVAIASN  
GGRPALE **SIVAQLSRPDPALAAL TNDHLVALACLGGRPALDAVKKGLG**

ND4.2-DdCBE Right mitoTALE repeat

**DIADLRTL**GY**SQQQ**QEKIKPKV**RSTVAQHHEALVGHGFT**HAHIVAL**SQHPAALGTVA**  
**VKYQDMIAALPEATHEAIVGVGKQWSGARALEALLTVAGELRGPPLQLDTGQLLKIA**  
**KRGGVTAVEAVHAWRNALTGAPLNLT**PEQVVAIASNGGGKQALETVQALLPVLCQAH  
GLTPQQVVAIASNGGGKQALETVQRLLPVLCQAHGLTPQQVVAIASNGGGKQALETVQ  
RLLPVLCQAHGLTPEQVVAIASHDGGKQALETVQALLPVLCQAHGLTPEQVVAIASN  
GGKQALETVQALLPVLCQAHGLTPEQVVAIASNIGGKQALETVQALLPVLCQAHGLTPE  
QVVAIASNGGGKQALETVQRLLPVLCQAHGLTPEQVVAIASNGGGKQALETVQALLPV  
LCQAHGLTPQQVVAIASNIGGKQALETVQRLLPVLCQAHGLTPEQVVAIASNGGGKQA  
LETVQRLLPVLCQAHGLTPQQVVAIASNGGGKQALETVQRLLPVLCQAHGLTPQQVVA  
IASNIGGRPALE **SIVAQLSRPDPALAAL TNDHLVALACLGGRPALDAVKKGLG**

ND4.2-DdCBE Left mitoTALE repeat

**DIADLRTLGYSSQQQEKIKPKVRSSTVAQHHEALVGHGFTHAHIVALSQHPAALGTVA  
VKYQDMIAALPEATHEAIVGVGKQWSGARALEALLTVAGELRGPPLQLDTGQLLKIA  
KRGGVTAVEAVHAWRNALTGAPLNLTPEQVVAIASNNGGKQALETVQALLPVLCQAH  
GLTPQQVVAIASNIGGKQALETVQRLLPVLCQAHGLTPQQVVAIASNIGGKQALETVQR  
LLPVLCQAHGLTPEQVVAIASNNGGKQALETVQALLPVLCQAHGLTPEQVVAIASHDG  
GKQALETVQALLPVLCQAHGLTPEQVVAIASNNGGKQALETVQALLPVLCQAHGLTPE  
QVVAIASNNGGKQALETVQRLLPVLCQAHGLTPEQVVAIASHDGGKQALETVQALLPV  
LCQAHGLTPQQVVAIASNIGGKQALETVQRLLPVLCQAHGLTPQQVVAIASHDGGKQA  
LETVQRLLPVLCQAHGLTPQQVVAIASHDGGRPALE **SIVAQLSRPDPALAAL TNDHLV  
ALACLGGRPALDAVKKGLG****

ND4.3-DdCBE Right mitoTALE repeat

**DIADLRTLGYSSQQQEKIKPKVRSSTVAQHHEALVGHGFTHAHIVALSQHPAALGTVA  
VKYQDMIAALPEATHEAIVGVGKQWSGARALEALLTVAGELRGPPLQLDTGQLLKIA  
KRGGVTAVEAVHAWRNALTGAPLNLTPEQVVAIASNNGGKQALETVQALLPVLCQAH  
GLTPQQVVAIASNNGGKQALETVQRLLPVLCQAHGLTPQQVVAIASHDGGKQALETVQ  
RLLPVLCQAHGLTPEQVVAIASNNGGKQALETVQALLPVLCQAHGLTPEQVVAIASNN  
GGKQALETVQALLPVLCQAHGLTPEQVVAIASNNGGKQALETVQALLPVLCQAHGLTP  
EQVVAIASNNGGKQALETVQRLLPVLCQAHGLTPEQVVAIASNIGGKQALETVQALLPV  
LCQAHGLTPEQVVAIASHDGGKQALETVQRLLPVLCQAHGLTPQQVVAIASNNGGRP  
ALE **SIVAQLSRPDPALAAL TNDHL VALACLGGRPALDAVKKGLG****

ND4.3-DdCBE Left mitoTALE repeat

**DIADLRTLGYSSQQQEKIKPKVRSSTVAQHHEALVGHGFTHAHIVALSQHPAALGTVA  
VKYQDMIAALPEATHEAIVGVGKQWSGARALEALLTVAGELRGPPLQLDTGQLLKIA  
KRGGVTAVEAVHAWRNALTGAPLNLTPEQVVAIASHDGGKQALETVQALLPVLCQAH  
GLTPQQVVAIASNNGGKQALETVQRLLPVLCQAHGLTPQQVVAIASNNGGKQALETV  
QRLLPVLCQAHGLTPEQVVAIASHDGGKQALETVQALLPVLCQAHGLTPEQVVAIASNI  
GGKQALETVQALLPVLCQAHGLTPEQVVAIASNIGGKQALETVQALLPVLCQAHGLTPE  
QVVAIASNNGGKQALETVQRLLPVLCQAHGLTPEQVVAIASHDGGKQALETVQALLPV  
LCQAHGLTPQQVVAIASNIGGKQALETVQRLLPVLCQAHGLTPQQVVAIASNNGGKQA  
LETVQRLLPVLCQAHGLTPEQVVAIASHDGGKQALETVQRLLPVLCQAHGLTPQQVVA  
IASHDGGRPALE **SIVAQLSRPDPALAAL TNDHL VALACLGGRPALDAVKKGLG****

ND5.2-DdCBE Right mitoTALE repeat (Note: Terminal **NG** RVD recognizes a mismatched T instead of a G in the reference genome)

**DIADLRTLGYSSQQQEKIKPKVRSSTVAQHHEALVGHGFTHAHIVALSQHPAALGTVA  
VKYQDMIAALPEATHEAIVGVGKQWSGARALEALLTVAGELRGPPLQLDTGQLLKIA  
KRGGVTAVEAVHAWRNALTGAPLNLTPEQVVAIASNNGGKQALETVQRLLPVLCQA  
HGLTPEQVVAIASHDGGKQALETVQRLLPVLCQAHGLTPQQVVAIASNNGGKQALETV  
QRLLPVLCQAHGLTPEQVVAIASNIGGKQALETVQALLPVLCQAHGLTPQQVVAIASNN  
GGKQALETVQRLLPVLCQAHGLTPQQVVAIASNNGGKQALETVQRLLPVLCQAHGLTP  
EQVVAIASHDGGKQALETVQRLLPVLCQAHGLTPQQVVAIASNNGGKQALETVQRLLP  
VLCQAHGLTPQQVVAIASNNGGKQALETVQRLLPVLCQAHGLTPEQVVAIASHDGGK  
QALETVQRLLPVLCQAHGLTPEQVVAIASHDGGKQALETVQRLLPVLCQAHGLTPEQV**

VAIASNIGGKQALETVQALLPVLCQAHGLTPEQVVAIASNIGGKQALETVQALLPVLCQA  
HGLTPQQVVAIASNGGGGKQALETVQRLLPVLCQAHGLTPQQVVAIASNGGGGKQALETV  
QRLLPVLCQAHGLTPQQVVAIASNGGGRPALE **SIVAQLSRPDPALAALNDHLVALAC**  
**LGGRPALDAVKKGLG**

ND5.2-DdCBE Right mitoTALE repeat (non-mismatched)

**DIADLRTL**GYSQQQ**Q**EKIKPKVRSTVAQHHEALVGHGFT**H**AHIVAL**S**QHPAALGTVA  
VKYQDMIAALPEATHEAIVGVGKQWSGARALEALLTVAGELRGPPLQLDTGQLLKIA  
**K**RGVTAVEAVHAWRNAL**T**GAPLNLTPEQVVAIASNGGGGKQALETVQRLLPVLCQA  
HGLTPEQVVAIASHDGGKQALETVQRLLPVLCQAHGLTPQQVVAIASNGGGGKQALETV  
QRLLPVLCQAHGLTPEQVVAIASNIGGKQALETVQALLPVLCQAHGLTPQQVVAIASNGGG  
GKQALETVQRLLPVLCQAHGLTPQQVVAIASNGGGGKQALETVQRLLPVLCQAHGLTP  
EQVVAIASHDGGKQALETVQRLLPVLCQAHGLTPQQVVAIASNGGGGKQALETVQRLLP  
VLCQAHGLTPQQVVAIASNGGGGKQALETVQRLLPVLCQAHGLTPEQVVAIASHDGGK  
QALETVQRLLPVLCQAHGLTPEQVVAIASHDGGKQALETVQRLLPVLCQAHGLTPEQV  
VAIASNIGGKQALETVQALLPVLCQAHGLTPEQVVAIASNIGGKQALETVQALLPVLCQA  
HGLTPQQVVAIASNGGGGKQALETVQRLLPVLCQAHGLTPQQVVAIASNGGGGKQALETV  
QRLLPVLCQAHGLTPQQVVAIASNGGGGRPALE **SIVAQLSRPDPALAALNDHLVALAC**  
**LGGRPALDAVKKGLG**

ND5.2-DdCBE Left mitoTALE repeat

**DIADLRTL**GYSQQQ**Q**EKIKPKVRSTVAQHHEALVGHGFT**H**AHIVAL**S**QHPAALGTVA  
VKYQDMIAALPEATHEAIVGVGKQWSGARALEALLTVAGELRGPPLQLDTGQLLKIA  
**K**RGVTAVEAVHAWRNAL**T**GAPLNLTPEQVVAIASHDGGKQALETVQALLPVLCQAH  
GLTPQQVVAIASNIGGKQALETVQRLLPVLCQAHGLTPQQVVAIASNIGGKQALETVQR  
LLPVLCQAHGLTPEQVVAIASNIGGKQALETVQALLPVLCQAHGLTPEQVVAIASNIGGK  
QALETVQALLPVLCQAHGLTPEQVVAIASHDGGKQALETVQALLPVLCQAHGLTPEQV  
VAIASHDGGKQALETVQRLLPVLCQAHGLTPEQVVAIASNIGGKQALETVQALLPVLCQ  
AHGLTPEQVVAIASNGGGGKQALETVQRLLPVLCQAHGLTPEQVVAIASNIGGKQALETV  
QALLPVLCQAHGLTPEQVVAIASHDGGKQALETVQALLPVLCQAHGLTPEQVVAIASH  
DGGKQALETVQALLPVLCQAHGLTPEQVVAIASNGGGGKQALETVQRLLPVLCQAHGLT  
PQQVVAIASHDGGKQALETVQRLLPVLCQAHGLTPQQVVAIASNGGGGRPALE **SIVAQL**  
**SRPDPALAALNDHLVALACLGGRPALDAVKKGLG**

ND5.4-DdCBE Right mitoTALE repeat

**DIADLRTL**GYSQQQ**Q**EKIKPKVRSTVAQHHEALVGHGFT**H**AHIVAL**S**QHPAALGTVA  
VKYQDMIAALPEATHEAIVGVGKQWSGARALEALLTVAGELRGPPLQLDTGQLLKIA  
**K**RGVTAVEAVHAWRNAL**T**GAPLNLTPEQVVAIASNGGGGKQALETVQALLPVLCQAH  
GLTPQQVVAIASHDGGKQALETVQRLLPVLCQAHGLTPQQVVAIASNGGGGKQALETV  
QRLLPVLCQAHGLTPEQVVAIASNIGGKQALETVQALLPVLCQAHGLTPEQVVAIASNGGG  
GKQALETVQALLPVLCQAHGLTPEQVVAIASNGGGGKQALETVQALLPVLCQAHGLTP  
EQVVAIASNGGGGKQALETVQRLLPVLCQAHGLTPEQVVAIASNGGGGKQALETVQALLP  
VLCQAHGLTPQQVVAIASNGGGGRPALE **SIVAQLSRPDPALAALNDHLVALACLGGR**  
**PALDAVKKGLG**

ND5.4-DdCBE Left mitoTALE repeat

**DIADLRTLGYSSQQQKEKIKPKVRSSTVAQHHEALVGHGFTTHAHIVALSQHPAALGTVA  
VKYQDMIAALPEATHEAIVGVGKQWSGARALEALLTVAGELRGPPLQLDTGQLLKIA  
KRGGVTAVEAVHAWRNALTGAPLNLTPEQVVAIASHDGGKQALETVQALLPVLCQAH  
GLTPQQVVAIASNIGGKQALETVQRLLPVLCQAHGLTPQQVVAIASNNGGKQALETVQ  
RLLPVLCQAHGLTPEQVVAIASNIGGKQALETVQALLPVLCQAHGLTPEQVVAIASNIG  
GKQALETVQALLPVLCQAHGLTPEQVVAIASNNGGKQALETVQALLPVLCQAHGLTPE  
QVVAIASNIGGKQALETVQRLLPVLCQAHGLTPEQVVAIASNNGGKQALETVQALLPV  
CQAHGLTPEQVVAIASNNGGKQALETVQRLLPVLCQAHGLTPEQVVAIASNNGGKQA  
LETVQALLPVLCQAHGLTPEQVVAIASNIGGKQALETVQALLPVLCQAHGLTPEQVVAI  
ASHDGGKQALETVQRLLPVLCQAHGLTPQQVVAIASNIGGKQALETVQRLLPVLCQAH  
GLTPQQVVAIASNIGGRPALE **SIVAQLSRPDPALAAL TNDHLVALACLGGRPALDAVK  
KGLG****

ATP8-DdCBE Right mitoTALE repeat

**DIADLRTLGYSSQQQKEKIKPKVRSSTVAQHHEALVGHGFTTHAHIVALSQHPAALGTVA  
VKYQDMIAALPEATHEAIVGVGKQWSGARALEALLTVAGELRGPPLQLDTGQLLKIA  
KRGGVTAVEAVHAWRNALTGAPLNLTPEQVVAIASNIGGKQALETVQRLLPVLCQAH  
GLTPEQVVAIASNNGGKQALETVQRLLPVLCQAHGLTPQQVVAIASNNGGKQALETVQ  
RLLPVLCQAHGLTPEQVVAIASNNGGKQALETVQALLPVLCQAHGLTPQQVVAIASNN  
GGKQALETVQRLLPVLCQAHGLTPQQVVAIASHDGGKQALETVQRLLPVLCQAHGLTP  
EQVVAIASNNGGKQALETVQRLLPVLCQAHGLTPQQVVAIASNNGGKQALETVQRLLP  
VLCQAHGLTPQQVVAIASNNGGKQALETVQRLLPVLCQAHGLTPEQVVAIASNNGGK  
QALETVQRLLPVLCQAHGLTPEQVVAIASNNGGKQALETVQRLLPVLCQAHGLTPQQV  
VAIASNNGGRPALE **SIVAQLSRPDPALAAL TNDHLVALACLGGRPALDAVKKGLG****

ATP8-DdCBE Left mitoTALE repeat (Note: Terminal **NG** RVD recognizes a mismatched T instead of a C in the reference genome)

**DIADLRTLGYSSQQQKEKIKPKVRSSTVAQHHEALVGHGFTTHAHIVALSQHPAALGTVA  
VKYQDMIAALPEATHEAIVGVGKQWSGARALEALLTVAGELRGPPLQLDTGQLLKIA  
KRGGVTAVEAVHAWRNALTGAPLNLTPEQVVAIASNIGGKQALETVQALLPVLCQAH  
GLTPQQVVAIASNNGGKQALETVQRLLPVLCQAHGLTPQQVVAIASNNGGKQALETV  
QRLLPVLCQAHGLTPEQVVAIASNIGGKQALETVQALLPVLCQAHGLTPEQVVAIASNI  
GGKQALETVQALLPVLCQAHGLTPEQVVAIASNIGGKQALETVQALLPVLCQAHGLTPE  
QVVAIASHDGGKQALETVQRLLPVLCQAHGLTPEQVVAIASNIGGKQALETVQALLPV  
CQAHGLTPEQVVAIASHDGGKQALETVQRLLPVLCQAHGLTPEQVVAIASNIGGKQAL  
ETVQALLPVLCQAHGLTPEQVVAIASNIGGKQALETVQALLPVLCQAHGLTPEQVVAI  
SNIGGKQALETVQALLPVLCQAHGLTPEQVVAIASHDGGKQALETVQRLLPVLCQAHG  
LTPQQVVAIASNNGGKQALETVQRLLPVLCQAHGLTPEQVVAIASNIGGKQALETVQAL  
LPVLCQAHGLTPQQVVAIAS **NG** GGRPALE **SIVAQLSRPDPALAAL TNDHLVALACLG  
GRPALDAVKKGLG****

ATP8-DdCBE Left mitoTALE repeat (non-mismatched)

**DIADLRTLGYSSQQQKEKIKPKVRSSTVAQHHEALVGHGFTTHAHIVALSQHPAALGTVA  
VKYQDMIAALPEATHEAIVGVGKQWSGARALEALLTVAGELRGPPLQLDTGQLLKIA**

**KRGGVTAVEAVHAWRNALTGAPLNLTPEQVVAIASNIGGKQALETVQALLPVLCQAH  
GLTPQQVVAIASNNGGGKQALETVQRLLPVLCQAHGLTPQQVVAIASNNGGGKQALETV  
QRLLPVLCQAHGLTPEQVVAIASNIGGKQALETVQALLPVLCQAHGLTPEQVVAIASN  
GGKQALETVQALLPVLCQAHGLTPEQVVAIASNIGGKQALETVQALLPVLCQAHGLTPE  
QVVAIASHDGGKQALETVQRLLPVLCQAHGLTPEQVVAIASNIGGKQALETVQALLPV  
CQAHGLTPEQVVAIASHDGGKQALETVQRLLPVLCQAHGLTPEQVVAIASNIGGKQAL  
ETVQALLPVLCQAHGLTPEQVVAIASNIGGKQALETVQALLPVLCQAHGLTPEQVVAIA  
SNIGGKQALETVQALLPVLCQAHGLTPEQVVAIASHDGGKQALETVQRLLPVLCQAHG  
LTPQQVVAIASNNGGGKQALETVQRLLPVLCQAHGLTPEQVVAIASNIGGKQALETVQAL  
LPVLCQAHGLTPQQVVAIASHDGGRPALE **SIVAQLSRPDPALAALNDHLVALACLG  
RPALDAVKKGLG****

## Supplementary sequences 2 | Sequences of full-length DddA variants

DddA1 (T1380I)

GSYALGPYQISAPQLPAYNGQTVGTFYYVNDAGGLESKVFSSGGPTPYPNYANAGHV  
EGQSALFMRDNGISEGLVFHNNPEGTCGFCVNM<sup>I</sup>ETLLPENAKMTVVPPEGAIPVKRG  
ATGETKVFTGNSNSPKSPTKGGC

DddA2 (T1314A + T1380I)

GSYALGPYQISAPQLPAYNGQTVG<sup>A</sup>FYYVNDAGGLESKVFSSGGPTPYPNYANAGHV  
EGQSALFMRDNGISEGLVFHNNPEGTCGFCVNM<sup>I</sup>ETLLPENAKMTVVPPEGAIPVKRG  
ATGETKVFTGNSNSPKSPTKGGC

DddA3 (T1314A + T1380I + E1396K)

GSYALGPYQISAPQLPAYNGQTVG<sup>A</sup>FYYVNDAGGLESKVFSSGGPTPYPNYANAGHV  
EGQSALFMRDNGISEGLVFHNNPEGTCGFCVNM<sup>I</sup>ETLLPENAKMTVVP<sup>K</sup>GAIIPVKRG  
ATGETKVFTGNSNSPKSPTKGGC

DddA4 (T1380I + T1413I)

GSYALGPYQISAPQLPAYNGQTVGTFYYVNDAGGLESKVFSSGGPTPYPNYANAGHV  
EGQSALFMRDNGISEGLVFHNNPEGTCGFCVNM<sup>I</sup>ETLLPENAKMTVVPPEGAIPVKRG  
ATGETKVF<sup>I</sup>GNSNSPKSPTKGGC

DddA5 (Q1310R + S1330I + T1380I)

GSYALGPYQISAPQLPAYNG<sup>R</sup>TVGTFYYVNDAGGLESKVF<sup>I</sup>SSGGPTPYPNYANAGHVE  
GQSALFMRDNGISEGLVFHNNPEGTCGFCVNM<sup>I</sup>ETLLPENAKMTVVPPEGAIPVKRGA  
TGETKVFTGNSNSPKSPTKGGC

DddA6 (Q1310R + S1330I + T1380I + T1413I)

GSYALGPYQISAPQLPAYNG<sup>R</sup>TVGTFYYVNDAGGLESKVF<sup>I</sup>SSGGPTPYPNYANAGHVE  
GQSALFMRDNGISEGLVFHNNPEGTCGFCVNM<sup>I</sup>ETLLPENAKMTVVPPEGAIPVKRGA  
TGETKVF<sup>I</sup>GNSNSPKSPTKGGC

DddA7 (T1314A + G1344R + V1364M + E1370K + T1380I + T1413I)

GSYALGPYQISAPQLPAYNGQTVG<sup>A</sup>FYYVNDAGGLESKVFSSGGPTPYPNYANAR<sup>H</sup>V  
EGQSALFMRDNGISEGL<sup>M</sup>FHNNP<sup>K</sup>GTCGFCVNM<sup>I</sup>ETLLPENAKMTVVPPEGAIPVKRG  
ATGETKVF<sup>I</sup>GNSNSPKSPTKGGC

DddA8 (N1342S + G1344R + V1364M + E1370K + T1380I + T1413I)

GSYALGPYQISAPQLPAYNGQTVGTFYYVNDAGGLESKVFSSGGPTPYPNYA<sup>S</sup>ARHV  
EGQSALFMRDNGISEGL<sup>M</sup>FHNNP<sup>K</sup>GTCGFCVNM<sup>I</sup>ETLLPENAKMTVVPPEGAIPVKRG  
ATGETKVF<sup>I</sup>GNSNSPKSPTKGGC

DddA9 (T1314A + G1344S + E1370K + T1380I + A1398T + T1413I)

GSYALGPYQISAPQLPAYNGQTVG<sup>A</sup>FYYVNDAGGLESKVFSSGGPTPYPNYANAS<sup>H</sup>V  
EGQSALFMRDNGISEGLVFHNNP<sup>K</sup>GTCGFCVNM<sup>I</sup>ETLLPENAKMTVVPPEG<sup>T</sup>IPVKRG  
ATGETKVF<sup>I</sup>GNSNSPKSPTKGGC

DddA10 (T1314A + G1344S + E1370K + T1380I + E1396K + A1398T + T1413I)  
GSYALGPYQISAPQLPAYNGQTVGAFYVYVNDAGGLESKVFSSGGPTYPNYANASHV  
EGQSALFMRDNGISEGLVFHNNPKGTGFCVNM IETLLPENAKMTVPPKGTIPVKRG  
ATGETKVFIGNSNSPKSPTKGGC

DddA11 (S1330I + A1341V + N1342S + E1370K + T1380I + T1413I)  
GSYALGPYQISAPQLPAYNGQTVGTFYVYVNDAGGLESKVFISGGPTYPNYVSAGHVE  
GQSALFMRDNGISEGLVFHNNPKGTGFCVNM IETLLPENAKMTVPPPEGAIPVKRGA  
TGETKVFIGNSNSPKSPTKGGC

DddA-7.9.1(E1325K + S1330I + A1341V + N1342S + E1370K + N1378S + T1380I +  
T1413I)  
GSYALGPYQISAPQLPAYNGQTVGTFYVYVNDAGGLKSKVFISSGGPTYPNYVSAGHVE  
GQSALFMRDNGISEGLVFHNNPKGTGFCVSM IETLLPENAKMTVPPPEGAIPVKRGA  
TGETKVFIGNSNSPKSPTKGGC

DddA-7.12.1(S1330I + A1341I + N1342S + E1370K + N1378S + T1380I + P1394S +  
T1413I)  
GSYALGPYQISAPQLPAYNGQTVGTFYVYVNDAGGLESKVFISGGPTYPNYISAGHVE  
GQSALFMRDNGISEGLVFHNNPKGTGFCVSM IETLLPENAKMTVVSPEGAIPVKRGA  
TGETKVFIGNSNSPKSPTKGGC

DddA-7.12.2 (S1330I + P1334S + A1341V + N1342S + E1370K + N1378S + T1380I +  
T1413I)  
GSYALGPYQISAPQLPAYNGQTVGTFYVYVNDAGGLESKVFISGGSTYPNYVSAGHVE  
GQSALFMRDNGISEGLVFHNNPKGTGFCVSM IETLLPENAKMTVPPPEGAIPVKRGA  
TGETKVFIGNSNSPKSPTKGGC

DddA-7.12.3 (S1330I + P1334S + P1336S + A1341V + N1342S + E1370K + N1378S +  
T1380I + T1413I)  
GSYALGPYQISAPQLPAYNGQTVGTFYVYVNDAGGLESKVFISGGSTSYPNYVSAGHVE  
GQSALFMRDNGISEGLVFHNNPKGTGFCVSM IETLLPENAKMTVPPPEGAIPVKRGA  
TGETKVFIGNSNSPKSPTKGGC

### Supplementary Sequences 3 | Sequences used in fluorescence-activated cell sorting of DdCBE expressing cells

Right-side halves of DdCBE have the general architecture of (from N- to C-terminus):  
COX8A MTS–3xFLAG–mitoTALE–GS linker–DddA half–SGGS linker–1x-UGI–GSG linker–P2A–eGFP–ATP5B 3'UTR

Right-side halves of DdCBE have the general architecture of (from N- to C-terminus):  
SOD2 MTS–3xHA–mitoTALE–GS linker–DddA half–SGGS linker–1x-UGI–GSG linker–P2A–mCherry–SOD2 3'UTR

#### P2A sequence

ATNFSLLKQAGDVEENPGP

#### eGFP sequence

MVSKGEELFTGVVPILVLDGDVNGHKFSVSGEGEGDATYGKLTCLKFICTTGKLPVPW  
PTLVTTLTLYGVQCFSRYPDHMKQHDFFKSAMPEGYVQERTIFFKDDGNYKTRAEVKF  
EGDTLVNRIELKGIDFKEDGNILGHKLEYNYNSHNVYIMADKQKNGIKVNFKIRHNIEDG  
SVQLADHYQQNTPIGDGPVLLPDNHYLSTQSALS KDPNEKRDHMLLEFVTAAGITLG  
MDELYK

#### mCherry sequence

MVSKGEEDNMAIIEKFMRFKVHMEGSVNGHEFEIEGEGEGRPYEGTQTAKLKVTKGG  
PLPFAWDILSPQFMYGSKAYVKHPADIPDYLKLSFPEGFKWERVMNFEDGGVVTVTQ  
DSSLQDGEFIYKVKLRGTNFPDGPVMQKKTMGWEASSERMYPEDGALKGEIKQRLK  
LKDGGHYDAEVKTTYKAKKPVQLPGAYNVNIKLDITSHNEDYTIVEQYERAEGRHSTG  
GMDELYK



**Supplementary Note 1.** Mitochondrial editing efficiencies of DdCBEs containing a mismatched or non-mismatched terminal TALE repeat

The original right TALE in ND5.2-DdCBE contained an RVD in the terminal repeat that recognized a mismatched thymine instead of guanine. The original left TALE in ATP8-DdCBE contained an RVD in the terminal repeat that recognized a mismatched thymine instead of cytosine<sup>48</sup>. To clarify the effect of a mismatched RVD on mitochondrial editing efficiencies, we compared the base editing activities between the DdCBE containing the mismatched RVD (labelled as T) and the variant containing the non-mismatched RVD, which is labelled as G for ND5.2-DdCBE (a) and C for ATP8-DdCBE (b).

The editing efficiencies for mismatched DdCBEs containing DddA variants were generally comparable to or resulted in 2-10% higher average editing than the equivalent non-mismatched DdCBE (see a and b). Given that DdCBEs containing DddA6 or DddA11 resulted in similar editing efficiencies when tested as a mismatched TALE or non-mismatched TALE, all subsequent figures, except for Figs. 2c, 2d, 3d and 3e, are produced from DdCBEs containing the original mismatched RVD. Values and error bars reflect the mean $\pm$ s.d of n=3 independent biological replicates

**a**

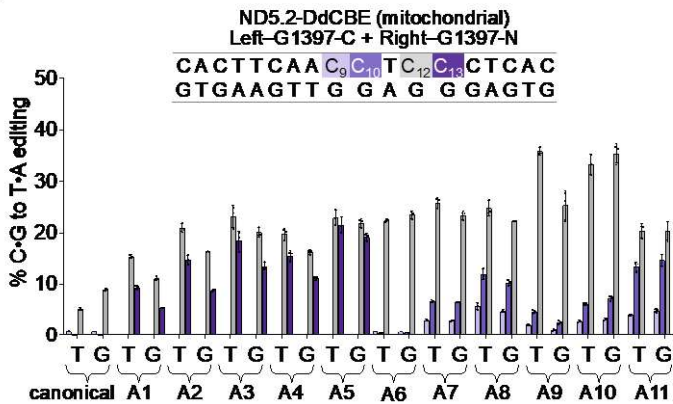

**b**

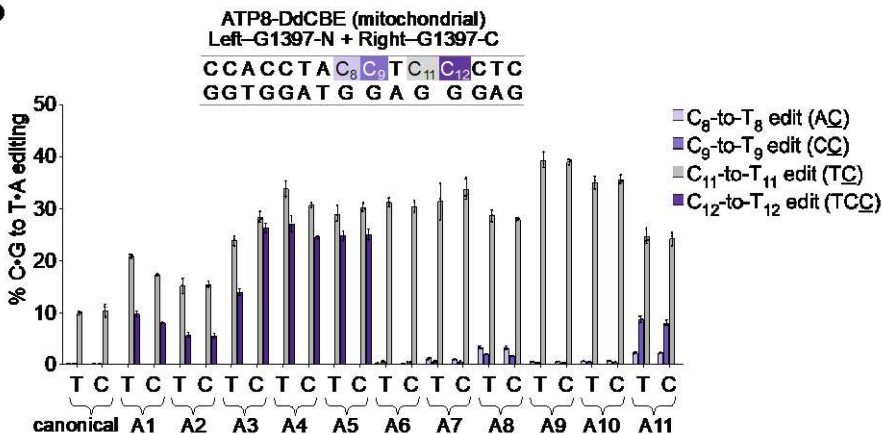

## Supplementary Note 2. Representative FACS gating plots for eGFP<sup>+</sup>/mCherry<sup>+</sup> cells

FACs gating plots for eGFP<sup>+</sup> and mCherry<sup>+</sup> cell sorting to isolate HeLa cells (Graphic 1), K562 cells (Graphic 2), U2OS cells (Graphic 3) and HEK293T cells (Graphic 4) expressing both halves of ND5.2-DdCBE. The image data was generated on a Sony LE-MA900 cytometer using Cell Sorter Software v. 3.0.5. Cells were initially gated on population using FSC-A/BSC-A (Gate A), then sorted for singlets using FSC-A/FSC-H (Singlet). Live cells were sorted for by gating mCherry-positive and eGFP-positive cells (Double positive). Single-color eGFP and mCherry controls were used for compensation.

### Graphic 1

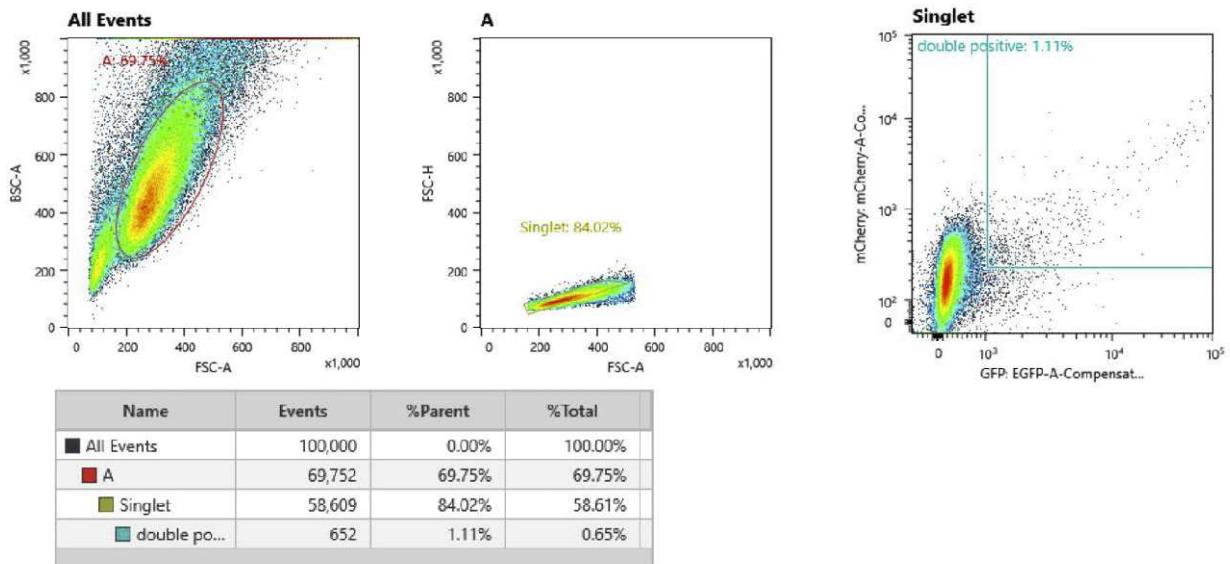

### Graphic 2

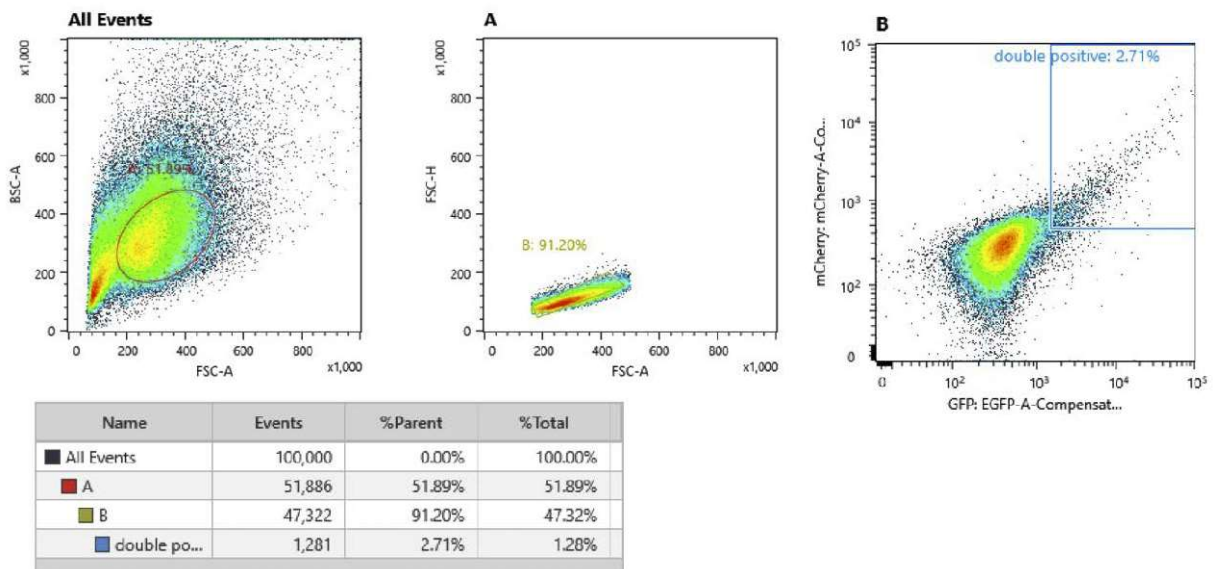

### Graphic 3

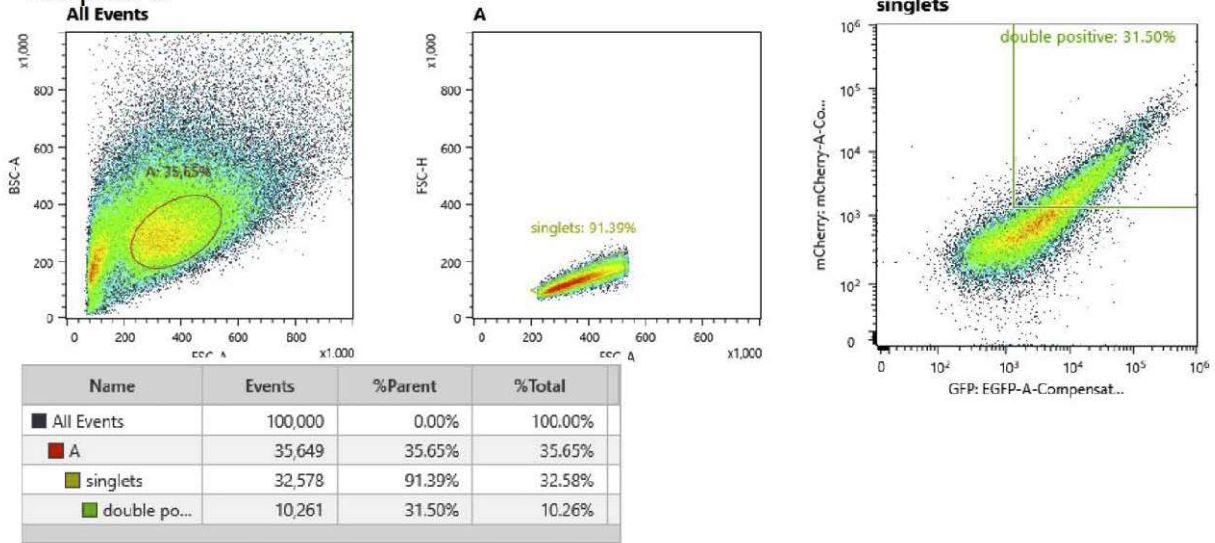

### Graphic 4

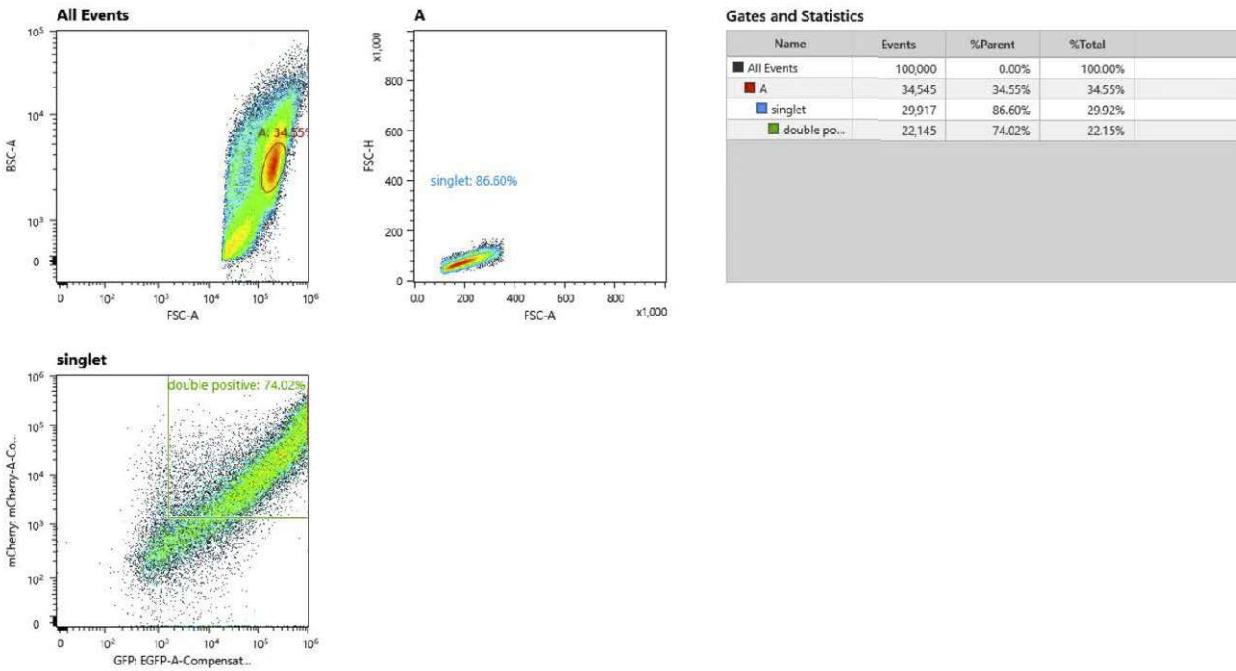

### Supplementary Note 3. Nuclear editing efficiencies of DdCBEs containing N-terminal UGI fusions or C-terminal UGI fusions

We previously reported that the N-terminal 2xUGI fusion of a nuclear-targeting DdCBE resulted in more efficient nuclear base editing compared to a C-terminal 1xUGI fusion<sup>18</sup>. We compared the editing efficiencies of these two architectures in SIRT6-DdCBE (a) and JAK2-DdCBE (b). Consistent with earlier observations, N-terminal UGI fusions generally yielded higher TC and non-TC editing efficiencies compared to C-terminal fusions, except for canonical JAK2-DdCBE. Values and error bars reflect the mean±s.d of n=3 independent biological replicates

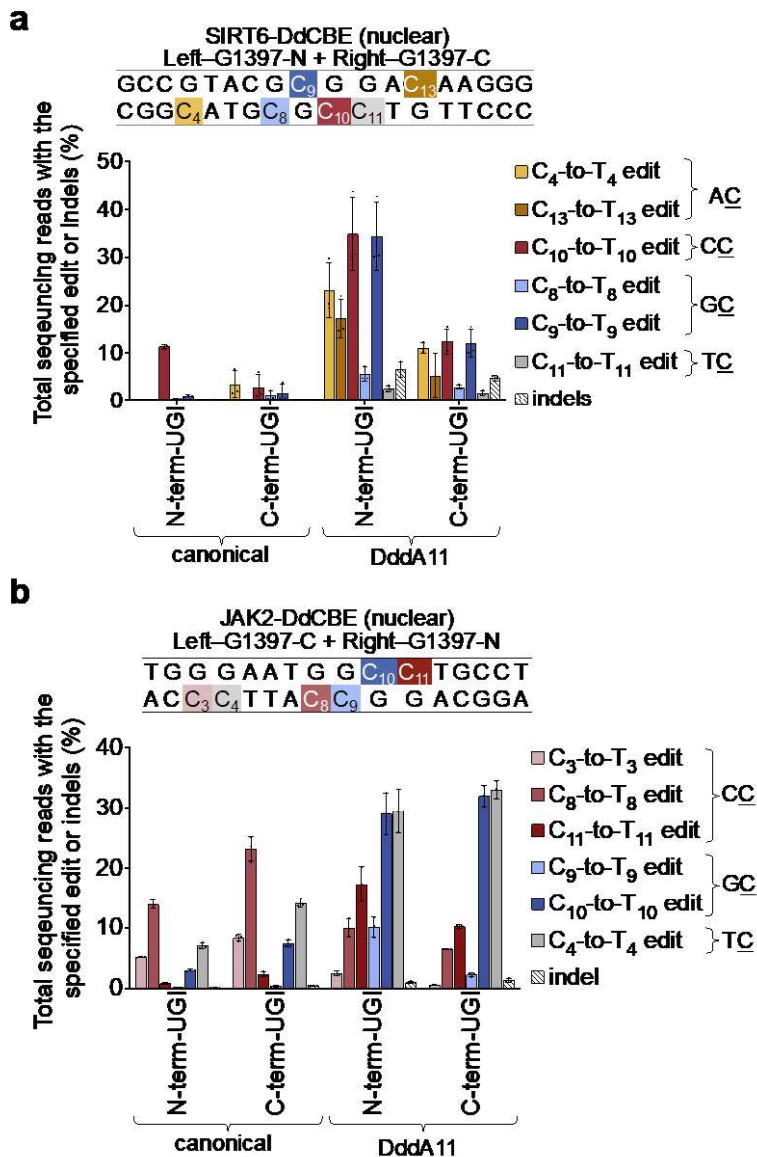

## Supplementary References

- 45 Yu, Q. *et al.* Single-strand specificity of APOBEC3G accounts for minus-strand deamination of the HIV genome. *Nat Struct Mol Biol* **11**, 435-442, doi:10.1038/nsmb758 (2004).
- 46 Maiti, A. *et al.* Crystal structure of the catalytic domain of HIV-1 restriction factor APOBEC3G in complex with ssDNA. *Nature Communications* **9**, 2460, doi:10.1038/s41467-018-04872-8 (2018).
- 47 Rathore, A. *et al.* The Local Dinucleotide Preference of APOBEC3G Can Be Altered from 5'-CC to 5'-TC by a Single Amino Acid Substitution. *Journal of Molecular Biology* **425**, 4442-4454, doi:<https://doi.org/10.1016/j.jmb.2013.07.040> (2013).
- 48 Bacman, S. R. *et al.* MitoTALEN reduces mutant mtDNA load and restores tRNA(Ala) levels in a mouse model of heteroplasmic mtDNA mutation. *Nat Med* **24**, 1696-1700, doi:10.1038/s41591-018-0166-8 (2018).
